# Supplementary material
Source: publisher figshare collection journal article supplement (https://acs.figshare.com/ndownloader/files/4411483)
Supplement: Supplementary file 1 [file 4411483]

 
data_5Ph
_publ_requested_journal          Inorg.Chem.
_publ_contact_author_name        'Paul J. Ragogna'
_publ_contact_author_address     
'Department of Chemistry, The University of Western Ontario, The Chemistry Building, 1151 Richmond Street, London, Ontario N6A 5B7, Canada'
_publ_contact_author_email       pragogna@uwo.ca
_publ_contact_author_phone       1-519-661-2111x87048
_publ_contact_author_fax         1-519-661-3022
loop_
_publ_author_name
_publ_author_address
'Ragogna, Paul J.'
'Department of Chemistry, The University of Western Ontario, The Chemistry Building, 1151 Richmond Street, London, Ontario N6A 5B7, Canada'
'Martin, Caleb D.'
'Department of Chemistry, The University of Western Ontario, The Chemistry Building, 1151 Richmond Street, London, Ontario N6A 5B7, Canada'

_audit_creation_method           SHELXL-97
_chemical_name_systematic        
; 
 ? 
;
_chemical_name_common            ?
_chemical_melting_point          ?
_chemical_formula_moiety         ?
_chemical_formula_sum            'C24 H18 F6 N2 O6 S3'
_chemical_formula_weight         640.58

loop_
_atom_type_symbol
_atom_type_description
_atom_type_scat_dispersion_real
_atom_type_scat_dispersion_imag
_atom_type_scat_source
C C .0033 .0016 'International Tables Vol C Tables 4.2.6.8 and 6.1.1.4'
H H .0000 .0000 'International Tables Vol C Tables 4.2.6.8 and 6.1.1.4'
N N .0061 .0033 'International Tables Vol C Tables 4.2.6.8 and 6.1.1.4'
O O .0106 .0060 'International Tables Vol C Tables 4.2.6.8 and 6.1.1.4'
S S .1246 .1234 'International Tables Vol C Tables 4.2.6.8 and 6.1.1.4'
F F .0171 .0103 'International Tables Vol C Tables 4.2.6.8 and 6.1.1.4'

_symmetry_cell_setting           Monoclinic
_symmetry_space_group_name_H-M   C2/c

loop_
_symmetry_equiv_pos_as_xyz
'x, y, z'
'-x, y, -z+1/2'
'x+1/2, y+1/2, z'
'-x+1/2, y+1/2, -z+1/2'
'-x, -y, -z'
'x, -y, z-1/2'
'-x+1/2, -y+1/2, -z'
'x+1/2, -y+1/2, z-1/2'

_cell_length_a                   25.234(3)
_cell_length_b                   9.8706(13)
_cell_length_c                   11.2571(15)
_cell_angle_alpha                90.00
_cell_angle_beta                 104.2900(10)
_cell_angle_gamma                90.00
_cell_volume                     2717.1(6)
_cell_formula_units_Z            4
_cell_measurement_temperature    173(2)
_cell_measurement_reflns_used    10737
_cell_measurement_theta_min      0.929694
_cell_measurement_theta_max      28.0854

_exptl_crystal_description       block
_exptl_crystal_colour            colorless
_exptl_crystal_size_max          0.50
_exptl_crystal_size_mid          0.50
_exptl_crystal_size_min          0.20
_exptl_crystal_density_meas      ?
_exptl_crystal_density_diffrn    1.566
_exptl_crystal_density_method    'not measured'
_exptl_crystal_F_000             1304
_exptl_absorpt_coefficient_mu    0.357
_exptl_absorpt_correction_type   multi-scan
_exptl_absorpt_correction_T_min  0.8416
_exptl_absorpt_correction_T_max  0.9320
_exptl_absorpt_process_details   'SADABS; Bruker 2001'

_exptl_special_details           
; 
 ? 
;

_diffrn_ambient_temperature      173(2)
_diffrn_radiation_wavelength     0.71073
_diffrn_radiation_type           MoK\a
_diffrn_radiation_source         'fine-focus sealed tube'
_diffrn_radiation_monochromator  graphite
_diffrn_measurement_device_type  'CCD area detector'
_diffrn_measurement_method       'phi and omega scans'
_diffrn_detector_area_resol_mean ?
_diffrn_standards_number         ?
_diffrn_standards_interval_count ?
_diffrn_standards_interval_time  ?
_diffrn_standards_decay_%        ?
_diffrn_reflns_number            12084
_diffrn_reflns_av_R_equivalents  0.0413
_diffrn_reflns_av_sigmaI/netI    0.0345
_diffrn_reflns_limit_h_min       -29
_diffrn_reflns_limit_h_max       30
_diffrn_reflns_limit_k_min       -11
_diffrn_reflns_limit_k_max       11
_diffrn_reflns_limit_l_min       -13
_diffrn_reflns_limit_l_max       13
_diffrn_reflns_theta_min         1.67
_diffrn_reflns_theta_max         25.03
_reflns_number_total             2394
_reflns_number_gt                1912
_reflns_threshold_expression     >2sigma(I)

_computing_data_collection       'Bruker SMART'
_computing_cell_refinement       'Bruker SMART'
_computing_data_reduction        'Bruker SAINT'
_computing_structure_solution    'SHELXS-97 (Sheldrick, 1990)'
_computing_structure_refinement  'SHELXL-97 (Sheldrick, 1997)'
_computing_molecular_graphics    'Bruker SHELXTL'
_computing_publication_material  'Bruker SHELXTL'

_refine_special_details          
; 
 Refinement of F^2^ against ALL reflections.  The weighted R-factor wR and 
 goodness of fit S are based on F^2^, conventional R-factors R are based 
 on F, with F set to zero for negative F^2^. The threshold expression of 
 F^2^ > 2sigma(F^2^) is used only for calculating R-factors(gt) etc. and is 
 not relevant to the choice of reflections for refinement.  R-factors based 
 on F^2^ are statistically about twice as large as those based on F, and R- 
 factors based on ALL data will be even larger. 
;

_refine_ls_structure_factor_coef Fsqd
_refine_ls_matrix_type           full
_refine_ls_weighting_scheme      calc
_refine_ls_weighting_details     
'calc w=1/[\s^2^(Fo^2^)+(0.0802P)^2^+2.6186P] where P=(Fo^2^+2Fc^2^)/3'
_atom_sites_solution_primary     direct
_atom_sites_solution_secondary   difmap
_atom_sites_solution_hydrogens   geom
_refine_ls_hydrogen_treatment    constr
_refine_ls_extinction_method     none
_refine_ls_extinction_coef       ?
_refine_ls_number_reflns         2394
_refine_ls_number_parameters     186
_refine_ls_number_restraints     0
_refine_ls_R_factor_all          0.0800
_refine_ls_R_factor_gt           0.0596
_refine_ls_wR_factor_ref         0.1657
_refine_ls_wR_factor_gt          0.1497
_refine_ls_goodness_of_fit_ref   1.283
_refine_ls_restrained_S_all      1.283
_refine_ls_shift/su_max          0.001
_refine_ls_shift/su_mean         0.000

loop_
_atom_site_label
_atom_site_type_symbol
_atom_site_fract_x
_atom_site_fract_y
_atom_site_fract_z
_atom_site_U_iso_or_equiv
_atom_site_adp_type
_atom_site_occupancy
_atom_site_symmetry_multiplicity
_atom_site_calc_flag
_atom_site_refinement_flags
_atom_site_disorder_assembly
_atom_site_disorder_group
S2 S 0.10347(4) 0.19450(10) 0.93559(8) 0.0250(3) Uani 1 1 d . . .
S1 S 0.0000 -0.02797(14) 0.7500 0.0321(4) Uani 1 2 d S . .
C12 C -0.19370(15) -0.3040(4) 0.3035(3) 0.0286(9) Uani 1 1 d . . .
H12A H -0.1706 -0.2438 0.2737 0.034 Uiso 1 1 calc R . .
N1 N -0.04785(12) -0.1407(3) 0.6667(3) 0.0246(7) Uani 1 1 d . . .
O2 O 0.07615(12) 0.1193(3) 1.0119(2) 0.0390(7) Uani 1 1 d . . .
O1 O 0.09115(12) 0.1481(3) 0.8115(2) 0.0421(8) Uani 1 1 d . . .
C11 C -0.18116(14) -0.3378(4) 0.4277(3) 0.0238(8) Uani 1 1 d . . .
C6 C -0.09107(15) -0.1814(4) 0.7093(3) 0.0273(9) Uani 1 1 d . . .
H6A H -0.0919 -0.1619 0.7914 0.033 Uiso 1 1 calc R . .
C4 C -0.13383(14) -0.2756(3) 0.5124(3) 0.0213(8) Uani 1 1 d . . .
C2 C -0.04608(15) -0.1679(4) 0.5495(3) 0.0255(8) Uani 1 1 d . . .
H2A H -0.0154 -0.1401 0.5209 0.031 Uiso 1 1 calc R . .
C5 C -0.13305(15) -0.2496(4) 0.6354(3) 0.0282(9) Uani 1 1 d . . .
H5A H -0.1624 -0.2803 0.6673 0.034 Uiso 1 1 calc R . .
C13 C -0.23944(15) -0.3572(4) 0.2239(4) 0.0335(10) Uani 1 1 d . . .
H13A H -0.2484 -0.3310 0.1401 0.040 Uiso 1 1 calc R . .
O3 O 0.15952(12) 0.2254(4) 0.9876(3) 0.0536(9) Uani 1 1 d . . .
C3 C -0.08789(14) -0.2346(4) 0.4729(3) 0.0246(8) Uani 1 1 d . . .
H3A H -0.0860 -0.2537 0.3914 0.030 Uiso 1 1 calc R . .
C16 C -0.21466(15) -0.4294(4) 0.4686(4) 0.0357(10) Uani 1 1 d . . .
H16A H -0.2067 -0.4535 0.5529 0.043 Uiso 1 1 calc R . .
C15 C -0.25938(17) -0.4856(5) 0.3873(4) 0.0453(12) Uani 1 1 d . . .
H15A H -0.2815 -0.5501 0.4153 0.054 Uiso 1 1 calc R . .
C14 C -0.27201(16) -0.4479(4) 0.2653(4) 0.0387(11) Uani 1 1 d . . .
H14A H -0.3033 -0.4849 0.2100 0.046 Uiso 1 1 calc R . .
F3 F 0.08786(12) 0.4417(3) 0.8508(3) 0.0674(9) Uani 1 1 d . . .
F2 F 0.08044(15) 0.4180(3) 1.0350(3) 0.0782(10) Uani 1 1 d . . .
F1 F 0.01653(11) 0.3473(3) 0.8842(3) 0.0749(10) Uani 1 1 d . . .
C20 C 0.07059(18) 0.3597(5) 0.9261(5) 0.0448(11) Uani 1 1 d . . .

loop_
_atom_site_aniso_label
_atom_site_aniso_U_11
_atom_site_aniso_U_22
_atom_site_aniso_U_33
_atom_site_aniso_U_23
_atom_site_aniso_U_13
_atom_site_aniso_U_12
S2 0.0240(5) 0.0316(5) 0.0178(5) -0.0040(4) 0.0021(4) -0.0007(4)
S1 0.0327(8) 0.0248(7) 0.0294(8) 0.000 -0.0100(6) 0.000
C12 0.027(2) 0.030(2) 0.029(2) -0.0046(17) 0.0049(16) -0.0028(16)
N1 0.0257(16) 0.0253(17) 0.0202(16) 0.0017(13) 0.0005(13) 0.0001(13)
O2 0.0541(18) 0.0382(17) 0.0286(16) 0.0032(13) 0.0178(14) 0.0044(14)
O1 0.0588(19) 0.0457(18) 0.0220(15) -0.0074(13) 0.0106(14) -0.0154(15)
C11 0.0212(18) 0.0247(19) 0.025(2) 0.0012(16) 0.0045(15) 0.0014(15)
C6 0.033(2) 0.035(2) 0.0139(18) -0.0010(16) 0.0048(15) 0.0023(17)
C4 0.0230(18) 0.0209(19) 0.0197(19) 0.0037(15) 0.0046(15) 0.0015(14)
C2 0.0251(19) 0.029(2) 0.0224(19) 0.0039(16) 0.0067(15) -0.0025(16)
C5 0.025(2) 0.034(2) 0.027(2) 0.0036(17) 0.0093(16) -0.0023(16)
C13 0.031(2) 0.040(2) 0.026(2) -0.0046(18) 0.0010(17) 0.0038(18)
O3 0.0261(16) 0.065(2) 0.061(2) -0.0150(17) -0.0048(14) 0.0008(15)
C3 0.0276(19) 0.032(2) 0.0146(18) 0.0001(15) 0.0053(15) -0.0012(16)
C16 0.029(2) 0.044(3) 0.033(2) 0.0069(19) 0.0054(17) -0.0077(18)
C15 0.031(2) 0.044(3) 0.058(3) 0.003(2) 0.006(2) -0.0135(19)
C14 0.025(2) 0.039(2) 0.046(3) -0.008(2) -0.0036(18) -0.0014(18)
F3 0.069(2) 0.0438(17) 0.091(2) 0.0225(15) 0.0228(17) -0.0068(14)
F2 0.109(3) 0.0488(18) 0.085(2) -0.0272(17) 0.039(2) 0.0067(18)
F1 0.0339(15) 0.067(2) 0.122(3) 0.035(2) 0.0142(16) 0.0141(14)
C20 0.037(3) 0.038(3) 0.061(3) 0.009(2) 0.015(2) 0.002(2)

_geom_special_details            
; 
 All esds (except the esd in the dihedral angle between two l.s. planes) 
 are estimated using the full covariance matrix.  The cell esds are taken 
 into account individually in the estimation of esds in distances, angles 
 and torsion angles; correlations between esds in cell parameters are only 
 used when they are defined by crystal symmetry.  An approximate (isotropic) 
 treatment of cell esds is used for estimating esds involving l.s. planes. 
;

loop_
_geom_bond_atom_site_label_1
_geom_bond_atom_site_label_2
_geom_bond_distance
_geom_bond_site_symmetry_2
_geom_bond_publ_flag
S2 O3 1.424(3) . ?
S2 O1 1.430(3) . ?
S2 O2 1.434(3) . ?
S2 C20 1.821(5) . ?
S1 N1 1.737(3) . ?
S1 N1 1.737(3) 2_556 ?
S1 O1 2.829(3) . ?
C12 C13 1.379(5) . ?
C12 C11 1.395(5) . ?
C12 H12A 0.9500 . ?
N1 C6 1.356(5) . ?
N1 C2 1.359(4) . ?
C11 C16 1.392(5) . ?
C11 C4 1.466(5) . ?
C6 C5 1.354(5) . ?
C6 H6A 0.9500 . ?
C4 C3 1.400(5) . ?
C4 C5 1.404(5) . ?
C2 C3 1.356(5) . ?
C2 H2A 0.9500 . ?
C5 H5A 0.9500 . ?
C13 C14 1.373(6) . ?
C13 H13A 0.9500 . ?
C3 H3A 0.9500 . ?
C16 C15 1.381(6) . ?
C16 H16A 0.9500 . ?
C15 C14 1.382(6) . ?
C15 H15A 0.9500 . ?
C14 H14A 0.9500 . ?
F3 C20 1.321(5) . ?
F2 C20 1.321(6) . ?
F1 C20 1.334(5) . ?

loop_
_geom_angle_atom_site_label_1
_geom_angle_atom_site_label_2
_geom_angle_atom_site_label_3
_geom_angle
_geom_angle_site_symmetry_1
_geom_angle_site_symmetry_3
_geom_angle_publ_flag
O3 S2 O1 115.13(19) . . ?
O3 S2 O2 116.11(19) . . ?
O1 S2 O2 113.52(18) . . ?
O3 S2 C20 103.0(2) . . ?
O1 S2 C20 104.1(2) . . ?
O2 S2 C20 102.67(19) . . ?
N1 S1 N1 100.3(2) . 2_556 ?
N1 S1 O1 160.14(11) . . ?
N1 S1 O1 81.18(12) 2_556 . ?
C13 C12 C11 120.4(4) . . ?
C13 C12 H12A 119.8 . . ?
C11 C12 H12A 119.8 . . ?
C6 N1 C2 120.5(3) . . ?
C6 N1 S1 120.8(2) . . ?
C2 N1 S1 117.8(2) . . ?
S2 O1 S1 113.78(15) . . ?
C16 C11 C12 118.8(3) . . ?
C16 C11 C4 121.4(3) . . ?
C12 C11 C4 119.9(3) . . ?
C5 C6 N1 120.4(3) . . ?
C5 C6 H6A 119.8 . . ?
N1 C6 H6A 119.8 . . ?
C3 C4 C5 116.7(3) . . ?
C3 C4 C11 121.4(3) . . ?
C5 C4 C11 121.9(3) . . ?
C3 C2 N1 120.4(3) . . ?
C3 C2 H2A 119.8 . . ?
N1 C2 H2A 119.8 . . ?
C6 C5 C4 121.0(3) . . ?
C6 C5 H5A 119.5 . . ?
C4 C5 H5A 119.5 . . ?
C14 C13 C12 120.2(4) . . ?
C14 C13 H13A 119.9 . . ?
C12 C13 H13A 119.9 . . ?
C2 C3 C4 121.0(3) . . ?
C2 C3 H3A 119.5 . . ?
C4 C3 H3A 119.5 . . ?
C15 C16 C11 120.3(4) . . ?
C15 C16 H16A 119.8 . . ?
C11 C16 H16A 119.8 . . ?
C16 C15 C14 120.1(4) . . ?
C16 C15 H15A 120.0 . . ?
C14 C15 H15A 120.0 . . ?
C13 C14 C15 120.2(4) . . ?
C13 C14 H14A 119.9 . . ?
C15 C14 H14A 119.9 . . ?
F2 C20 F3 108.2(4) . . ?
F2 C20 F1 108.1(4) . . ?
F3 C20 F1 107.4(4) . . ?
F2 C20 S2 110.9(3) . . ?
F3 C20 S2 111.6(3) . . ?
F1 C20 S2 110.5(3) . . ?

loop_
_geom_torsion_atom_site_label_1
_geom_torsion_atom_site_label_2
_geom_torsion_atom_site_label_3
_geom_torsion_atom_site_label_4
_geom_torsion
_geom_torsion_site_symmetry_1
_geom_torsion_site_symmetry_2
_geom_torsion_site_symmetry_3
_geom_torsion_site_symmetry_4
_geom_torsion_publ_flag
N1 S1 N1 C6 92.8(3) 2_556 . . . ?
O1 S1 N1 C6 -174.6(3) . . . . ?
N1 S1 N1 C2 -98.5(3) 2_556 . . . ?
O1 S1 N1 C2 -5.9(6) . . . . ?
O3 S2 O1 S1 151.18(19) . . . . ?
O2 S2 O1 S1 13.9(2) . . . . ?
C20 S2 O1 S1 -96.9(2) . . . . ?
N1 S1 O1 S2 -172.2(3) . . . . ?
N1 S1 O1 S2 -76.2(2) 2_556 . . . ?
C13 C12 C11 C16 2.0(6) . . . . ?
C13 C12 C11 C4 -177.2(3) . . . . ?
C2 N1 C6 C5 0.0(5) . . . . ?
S1 N1 C6 C5 168.4(3) . . . . ?
C16 C11 C4 C3 151.5(4) . . . . ?
C12 C11 C4 C3 -29.4(5) . . . . ?
C16 C11 C4 C5 -31.0(5) . . . . ?
C12 C11 C4 C5 148.2(4) . . . . ?
C6 N1 C2 C3 0.9(5) . . . . ?
S1 N1 C2 C3 -167.9(3) . . . . ?
N1 C6 C5 C4 -2.3(6) . . . . ?
C3 C4 C5 C6 3.6(5) . . . . ?
C11 C4 C5 C6 -174.1(4) . . . . ?
C11 C12 C13 C14 -2.3(6) . . . . ?
N1 C2 C3 C4 0.6(6) . . . . ?
C5 C4 C3 C2 -2.7(5) . . . . ?
C11 C4 C3 C2 175.0(3) . . . . ?
C12 C11 C16 C15 0.1(6) . . . . ?
C4 C11 C16 C15 179.3(4) . . . . ?
C11 C16 C15 C14 -1.9(7) . . . . ?
C12 C13 C14 C15 0.5(6) . . . . ?
C16 C15 C14 C13 1.6(7) . . . . ?
O3 S2 C20 F2 -57.0(4) . . . . ?
O1 S2 C20 F2 -177.5(3) . . . . ?
O2 S2 C20 F2 63.9(3) . . . . ?
O3 S2 C20 F3 63.7(4) . . . . ?
O1 S2 C20 F3 -56.8(4) . . . . ?
O2 S2 C20 F3 -175.3(3) . . . . ?
O3 S2 C20 F1 -176.8(3) . . . . ?
O1 S2 C20 F1 62.7(4) . . . . ?
O2 S2 C20 F1 -55.9(4) . . . . ?

_diffrn_measured_fraction_theta_max .999
_diffrn_reflns_theta_full        25.03
_diffrn_measured_fraction_theta_full .999
_refine_diff_density_max         .517
_refine_diff_density_min         -.387
_refine_diff_density_rms         .113


data_5NMe2 
 
_audit_creation_method            SHELXL-97 
_chemical_name_systematic 
; 
 ? 
; 
_chemical_name_common             ? 
_chemical_melting_point           ? 
_chemical_formula_moiety          ? 
_chemical_formula_sum 
 'C16 H20 F6 N4 O6 S3' 
_chemical_formula_weight          574.54 
 
loop_ 
 _atom_type_symbol 
 _atom_type_description 
 _atom_type_scat_dispersion_real 
 _atom_type_scat_dispersion_imag 
 _atom_type_scat_source 
 'C'  'C'    .0033    .0016 
 'International Tables Vol C Tables 4.2.6.8 and 6.1.1.4' 
 'H'  'H'    .0000    .0000 
 'International Tables Vol C Tables 4.2.6.8 and 6.1.1.4' 
 'N'  'N'    .0061    .0033 
 'International Tables Vol C Tables 4.2.6.8 and 6.1.1.4' 
 'O'  'O'    .0106    .0060 
 'International Tables Vol C Tables 4.2.6.8 and 6.1.1.4' 
 'F'  'F'    .0171    .0103 
 'International Tables Vol C Tables 4.2.6.8 and 6.1.1.4' 
 'S'  'S'    .1246    .1234 
 'International Tables Vol C Tables 4.2.6.8 and 6.1.1.4' 
 
_symmetry_cell_setting            Monoclinic 
_symmetry_space_group_name_H-M    C2/c 
 
loop_ 
 _symmetry_equiv_pos_as_xyz 
 'x, y, z' 
 '-x, y, -z+1/2' 
 'x+1/2, y+1/2, z' 
 '-x+1/2, y+1/2, -z+1/2' 
 '-x, -y, -z' 
 'x, -y, z-1/2' 
 '-x+1/2, -y+1/2, -z' 
 'x+1/2, -y+1/2, z-1/2' 
 
_cell_length_a                    20.142(4) 
_cell_length_b                    10.009(2) 
_cell_length_c                    11.392(2) 
_cell_angle_alpha                 90.00 
_cell_angle_beta                  90.17(3) 
_cell_angle_gamma                 90.00 
_cell_volume                      2296.5(8) 
_cell_formula_units_Z             4 
_cell_measurement_temperature     150(2) 
_cell_measurement_reflns_used     5255 
_cell_measurement_theta_min       0.41
_cell_measurement_theta_max       25.03 
 
_exptl_crystal_description        'block' 
_exptl_crystal_colour             'colorless' 
_exptl_crystal_size_max           0.10 
_exptl_crystal_size_mid           0.10 
_exptl_crystal_size_min           0.05 
_exptl_crystal_density_meas       ? 
_exptl_crystal_density_diffrn     1.662 
_exptl_crystal_density_method     'not measured' 
_exptl_crystal_F_000              1176 
_exptl_absorpt_coefficient_mu     0.414 
_exptl_absorpt_correction_type    'multi-scan' 
_exptl_absorpt_correction_T_min   0.9598 
_exptl_absorpt_correction_T_max   0.9796 
_exptl_absorpt_process_details    'DENZO-SMN (Otwinowski & Minor, 1997)' 
 
_exptl_special_details 
; 
 ? 
; 
 
_diffrn_ambient_temperature       150(2) 
_diffrn_radiation_wavelength      0.71073 
_diffrn_radiation_type            MoK\a 
_diffrn_radiation_source          'fine-focus sealed tube' 
_diffrn_radiation_monochromator   graphite 
_diffrn_measurement_device_type   'Nonius Kappa-CCD' 
_diffrn_measurement_method        '\f scans, and \w scans' 
_diffrn_detector_area_resol_mean  ? 
_diffrn_standards_number          ? 
_diffrn_standards_interval_count  ? 
_diffrn_standards_interval_time   ? 
_diffrn_standards_decay_%         ? 
_diffrn_reflns_number             3547 
_diffrn_reflns_av_R_equivalents   0.0519 
_diffrn_reflns_av_sigmaI/netI     0.0650 
_diffrn_reflns_limit_h_min        -23 
_diffrn_reflns_limit_h_max        23 
_diffrn_reflns_limit_k_min        -11 
_diffrn_reflns_limit_k_max        11 
_diffrn_reflns_limit_l_min        -13 
_diffrn_reflns_limit_l_max        13 
_diffrn_reflns_theta_min          2.27 
_diffrn_reflns_theta_max          25.03 
_reflns_number_total              1915 
_reflns_number_gt                 1360 
_reflns_threshold_expression      >2sigma(I) 
 
_computing_data_collection        'COLLECT (Nonius, 1997-2001)'  
_computing_cell_refinement        'DENZO-SMN (Otwinowski & Minor, 1997)' 
_computing_data_reduction         'DENZO-SMN'  
_computing_structure_solution     'SHELXS-97 (Sheldrick, 1990)' 
_computing_structure_refinement   'SHELXL-97 (Sheldrick, 1997)' 
_computing_molecular_graphics     'SHELXTL/PC (Sheldrick, 2001)' 
_computing_publication_material   'SHELXTL/PC' 
 
_refine_special_details 
; 
 Refinement of F^2^ against ALL reflections.  The weighted R-factor wR and 
 goodness of fit S are based on F^2^, conventional R-factors R are based 
 on F, with F set to zero for negative F^2^. The threshold expression of 
 F^2^ > 2sigma(F^2^) is used only for calculating R-factors(gt) etc. and is 
 not relevant to the choice of reflections for refinement.  R-factors based 
 on F^2^ are statistically about twice as large as those based on F, and R- 
 factors based on ALL data will be even larger. 
; 
 
_refine_ls_structure_factor_coef  Fsqd  
_refine_ls_matrix_type            full 
_refine_ls_weighting_scheme       calc  
_refine_ls_weighting_details 
 'calc w=1/[\s^2^(Fo^2^)+(0.0400P)^2^+10.0778P] where P=(Fo^2^+2Fc^2^)/3' 
_atom_sites_solution_primary      direct 
_atom_sites_solution_secondary    difmap 
_atom_sites_solution_hydrogens    geom 
_refine_ls_hydrogen_treatment     constr 
_refine_ls_extinction_method      none 
_refine_ls_extinction_coef        ? 
_refine_ls_number_reflns          1915 
_refine_ls_number_parameters      159 
_refine_ls_number_restraints      0 
_refine_ls_R_factor_all           0.0909 
_refine_ls_R_factor_gt            0.0583 
_refine_ls_wR_factor_ref          0.1323 
_refine_ls_wR_factor_gt           0.1171 
_refine_ls_goodness_of_fit_ref    1.065 
_refine_ls_restrained_S_all       1.065 
_refine_ls_shift/su_max           0.000 
_refine_ls_shift/su_mean          0.000 
 
loop_ 
 _atom_site_label 
 _atom_site_type_symbol 
 _atom_site_fract_x 
 _atom_site_fract_y 
 _atom_site_fract_z 
 _atom_site_U_iso_or_equiv 
 _atom_site_adp_type 
 _atom_site_occupancy 
 _atom_site_symmetry_multiplicity 
 _atom_site_calc_flag 
 _atom_site_refinement_flags 
 _atom_site_disorder_assembly 
 _atom_site_disorder_group 
S1 S 0.5000 0.03474(15) 0.2500 0.0309(4) Uani 1 2 d S . . 
S2 S 0.62473(6) -0.19613(12) 0.37068(9) 0.0321(3) Uani 1 1 d . . . 
F3 F 0.51151(13) -0.3254(3) 0.3697(2) 0.0446(7) Uani 1 1 d . . . 
N11 N 0.44154(17) 0.1438(3) 0.1962(3) 0.0250(8) Uani 1 1 d . . . 
O1 O 0.60900(16) -0.1527(3) 0.2538(2) 0.0398(8) Uani 1 1 d . . . 
F2 F 0.58324(16) -0.4012(3) 0.4926(2) 0.0587(9) Uani 1 1 d . . . 
C3 C 0.3413(2) 0.2652(4) 0.2198(4) 0.0256(10) Uani 1 1 d . . . 
H3A H 0.3066 0.2948 0.2697 0.031 Uiso 1 1 calc R . . 
F1 F 0.59434(15) -0.4407(3) 0.3078(2) 0.0518(8) Uani 1 1 d . . . 
C4 C 0.3412(2) 0.3040(4) 0.0981(3) 0.0243(9) Uani 1 1 d . . . 
C5 C 0.3936(2) 0.2506(4) 0.0297(4) 0.0258(10) Uani 1 1 d . . . 
H5A H 0.3951 0.2690 -0.0521 0.031 Uiso 1 1 calc R . . 
C6 C 0.4415(2) 0.1739(4) 0.0789(3) 0.0267(10) Uani 1 1 d . . . 
H6A H 0.4760 0.1400 0.0308 0.032 Uiso 1 1 calc R . . 
C2 C 0.3898(2) 0.1876(4) 0.2637(3) 0.0257(10) Uani 1 1 d . . . 
H2A H 0.3882 0.1624 0.3441 0.031 Uiso 1 1 calc R . . 
O2 O 0.69186(16) -0.2385(4) 0.3876(3) 0.0531(10) Uani 1 1 d . . . 
O3 O 0.59783(17) -0.1117(3) 0.4614(2) 0.0414(8) Uani 1 1 d . . . 
C51 C 0.5760(2) -0.3475(4) 0.3859(4) 0.0353(11) Uani 1 1 d . . . 
C7 C 0.2430(2) 0.4486(5) 0.1229(4) 0.0365(11) Uani 1 1 d . . . 
H7B H 0.2459 0.4169 0.2041 0.055 Uiso 1 1 calc R . . 
H7C H 0.1992 0.4266 0.0905 0.055 Uiso 1 1 calc R . . 
H7D H 0.2494 0.5457 0.1211 0.055 Uiso 1 1 calc R . . 
C8 C 0.2953(2) 0.4239(5) -0.0719(4) 0.0371(12) Uani 1 1 d . . . 
H8B H 0.3310 0.3766 -0.1130 0.056 Uiso 1 1 calc R . . 
H8C H 0.3027 0.5204 -0.0775 0.056 Uiso 1 1 calc R . . 
H8D H 0.2526 0.4013 -0.1081 0.056 Uiso 1 1 calc R . . 
N2 N 0.29486(17) 0.3837(3) 0.0521(3) 0.0273(8) Uani 1 1 d . . . 
 
loop_ 
 _atom_site_aniso_label 
 _atom_site_aniso_U_11 
 _atom_site_aniso_U_22 
 _atom_site_aniso_U_33 
 _atom_site_aniso_U_23 
 _atom_site_aniso_U_13 
 _atom_site_aniso_U_12 
S1 0.0271(9) 0.0253(8) 0.0403(9) 0.000 -0.0088(7) 0.000 
S2 0.0321(6) 0.0366(6) 0.0276(6) 0.0012(5) -0.0050(5) 0.0062(5) 
F3 0.0336(16) 0.0567(18) 0.0435(16) -0.0051(13) 0.0043(13) 0.0017(13) 
N11 0.026(2) 0.0267(19) 0.023(2) 0.0023(15) -0.0025(16) 0.0002(16) 
O1 0.044(2) 0.052(2) 0.0237(17) 0.0062(14) 0.0000(14) 0.0019(16) 
F2 0.082(2) 0.0475(18) 0.0463(18) 0.0169(14) -0.0056(16) 0.0032(17) 
C3 0.024(2) 0.028(2) 0.025(2) -0.0020(18) -0.0008(18) -0.0020(19) 
F1 0.059(2) 0.0384(17) 0.0576(18) -0.0122(14) 0.0020(15) 0.0086(14) 
C4 0.023(2) 0.025(2) 0.025(2) -0.0009(18) -0.0027(19) -0.0034(19) 
C5 0.026(2) 0.032(2) 0.019(2) 0.0002(18) -0.0001(18) 0.0005(19) 
C6 0.026(2) 0.031(2) 0.023(2) -0.0060(18) 0.0049(19) -0.0036(19) 
C2 0.030(2) 0.031(2) 0.016(2) -0.0018(18) 0.0038(19) -0.005(2) 
O2 0.0311(19) 0.059(2) 0.069(2) 0.0004(19) -0.0175(17) 0.0117(17) 
O3 0.060(2) 0.0351(18) 0.0289(17) -0.0028(14) 0.0032(16) 0.0064(17) 
C51 0.041(3) 0.032(3) 0.033(3) -0.002(2) -0.007(2) 0.010(2) 
C7 0.029(3) 0.040(3) 0.041(3) 0.001(2) -0.002(2) 0.008(2) 
C8 0.036(3) 0.042(3) 0.033(3) 0.008(2) -0.006(2) -0.001(2) 
N2 0.026(2) 0.031(2) 0.0250(19) 0.0028(15) -0.0024(16) 0.0008(16) 
 
_geom_special_details 
; 
 All esds (except the esd in the dihedral angle between two l.s. planes) 
 are estimated using the full covariance matrix.  The cell esds are taken 
 into account individually in the estimation of esds in distances, angles 
 and torsion angles; correlations between esds in cell parameters are only 
 used when they are defined by crystal symmetry.  An approximate (isotropic) 
 treatment of cell esds is used for estimating esds involving l.s. planes. 
; 
 
loop_ 
 _geom_bond_atom_site_label_1 
 _geom_bond_atom_site_label_2 
 _geom_bond_distance 
 _geom_bond_site_symmetry_2 
 _geom_bond_publ_flag 
S1 N11 1.717(3) 2_655 ? 
S1 N11 1.717(3) . ? 
S1 O3 3.436(3) . ? 
S2 O2 1.430(3) . ? 
S2 O1 1.435(3) . ? 
S2 O3 1.442(3) . ? 
S2 C51 1.813(5) . ? 
F3 C51 1.331(5) . ? 
N11 C2 1.369(5) . ? 
N11 C6 1.370(5) . ? 
F2 C51 1.336(5) . ? 
C3 C2 1.344(6) . ? 
C3 C4 1.440(6) . ? 
C3 H3A 0.9500 . ? 
F1 C51 1.341(5) . ? 
C4 N2 1.334(5) . ? 
C4 C5 1.419(6) . ? 
C5 C6 1.353(6) . ? 
C5 H5A 0.9500 . ? 
C6 H6A 0.9500 . ? 
C2 H2A 0.9500 . ? 
C7 N2 1.472(5) . ? 
C7 H7B 0.9800 . ? 
C7 H7C 0.9800 . ? 
C7 H7D 0.9800 . ? 
C8 N2 1.469(5) . ? 
C8 H8B 0.9800 . ? 
C8 H8C 0.9800 . ? 
C8 H8D 0.9800 . ? 
 
loop_ 
 _geom_angle_atom_site_label_1 
 _geom_angle_atom_site_label_2 
 _geom_angle_atom_site_label_3 
 _geom_angle 
 _geom_angle_site_symmetry_1 
 _geom_angle_site_symmetry_3 
 _geom_angle_publ_flag 
N11 S1 N11 101.1(2) 2_655 . ? 
N11 S1 O3 68.27(12) 2_655 . ? 
N11 S1 O3 155.87(12) . . ? 
O2 S2 O1 114.9(2) . . ? 
O2 S2 O3 115.7(2) . . ? 
O1 S2 O3 113.90(19) . . ? 
O2 S2 C51 104.5(2) . . ? 
O1 S2 C51 102.9(2) . . ? 
O3 S2 C51 102.5(2) . . ? 
C2 N11 C6 118.6(3) . . ? 
C2 N11 S1 121.7(3) . . ? 
C6 N11 S1 119.2(3) . . ? 
C2 C3 C4 120.9(4) . . ? 
C2 C3 H3A 119.5 . . ? 
C4 C3 H3A 119.5 . . ? 
N2 C4 C5 122.0(4) . . ? 
N2 C4 C3 122.6(4) . . ? 
C5 C4 C3 115.3(4) . . ? 
C6 C5 C4 121.1(4) . . ? 
C6 C5 H5A 119.5 . . ? 
C4 C5 H5A 119.5 . . ? 
C5 C6 N11 121.9(4) . . ? 
C5 C6 H6A 119.0 . . ? 
N11 C6 H6A 119.0 . . ? 
C3 C2 N11 122.0(4) . . ? 
C3 C2 H2A 119.0 . . ? 
N11 C2 H2A 119.0 . . ? 
S2 O3 S1 87.91(13) . . ? 
F3 C51 F2 107.2(4) . . ? 
F3 C51 F1 107.1(4) . . ? 
F2 C51 F1 107.1(4) . . ? 
F3 C51 S2 112.1(3) . . ? 
F2 C51 S2 111.4(3) . . ? 
F1 C51 S2 111.6(3) . . ? 
N2 C7 H7B 109.5 . . ? 
N2 C7 H7C 109.5 . . ? 
H7B C7 H7C 109.5 . . ? 
N2 C7 H7D 109.5 . . ? 
H7B C7 H7D 109.5 . . ? 
H7C C7 H7D 109.5 . . ? 
N2 C8 H8B 109.5 . . ? 
N2 C8 H8C 109.5 . . ? 
H8B C8 H8C 109.5 . . ? 
N2 C8 H8D 109.5 . . ? 
H8B C8 H8D 109.5 . . ? 
H8C C8 H8D 109.5 . . ? 
C4 N2 C8 122.4(4) . . ? 
C4 N2 C7 123.0(3) . . ? 
C8 N2 C7 114.4(3) . . ? 
 
loop_ 
 _geom_torsion_atom_site_label_1 
 _geom_torsion_atom_site_label_2 
 _geom_torsion_atom_site_label_3 
 _geom_torsion_atom_site_label_4 
 _geom_torsion 
 _geom_torsion_site_symmetry_1 
 _geom_torsion_site_symmetry_2 
 _geom_torsion_site_symmetry_3 
 _geom_torsion_site_symmetry_4 
 _geom_torsion_publ_flag 
N11 S1 N11 C2 -91.1(3) 2_655 . . . ? 
O3 S1 N11 C2 -30.2(5) . . . . ? 
N11 S1 N11 C6 97.6(3) 2_655 . . . ? 
O3 S1 N11 C6 158.5(3) . . . . ? 
C2 C3 C4 N2 -178.2(4) . . . . ? 
C2 C3 C4 C5 2.4(6) . . . . ? 
N2 C4 C5 C6 177.6(4) . . . . ? 
C3 C4 C5 C6 -3.0(6) . . . . ? 
C4 C5 C6 N11 0.3(6) . . . . ? 
C2 N11 C6 C5 3.2(6) . . . . ? 
S1 N11 C6 C5 174.7(3) . . . . ? 
C4 C3 C2 N11 1.0(6) . . . . ? 
C6 N11 C2 C3 -3.8(6) . . . . ? 
S1 N11 C2 C3 -175.1(3) . . . . ? 
O2 S2 O3 S1 149.72(19) . . . . ? 
O1 S2 O3 S1 13.22(19) . . . . ? 
C51 S2 O3 S1 -97.20(16) . . . . ? 
N11 S1 O3 S2 -112.54(19) 2_655 . . . ? 
N11 S1 O3 S2 -180.0(3) . . . . ? 
O2 S2 C51 F3 -178.6(3) . . . . ? 
O1 S2 C51 F3 -58.2(3) . . . . ? 
O3 S2 C51 F3 60.3(3) . . . . ? 
O2 S2 C51 F2 61.2(4) . . . . ? 
O1 S2 C51 F2 -178.4(3) . . . . ? 
O3 S2 C51 F2 -59.9(4) . . . . ? 
O2 S2 C51 F1 -58.5(3) . . . . ? 
O1 S2 C51 F1 61.9(3) . . . . ? 
O3 S2 C51 F1 -179.6(3) . . . . ? 
C5 C4 N2 C8 -1.1(6) . . . . ? 
C3 C4 N2 C8 179.5(4) . . . . ? 
C5 C4 N2 C7 -175.2(4) . . . . ? 
C3 C4 N2 C7 5.5(6) . . . . ? 
 
_diffrn_measured_fraction_theta_max     .946 
_diffrn_reflns_theta_full              25.03 
_diffrn_measured_fraction_theta_full    .946 
_refine_diff_density_max     .461 
_refine_diff_density_min    -.400 
_refine_diff_density_rms     .081 

 
data_6Ph
 
_audit_creation_method            SHELXL-97 
_chemical_name_systematic 
; 
 ? 
; 
_chemical_name_common             ? 
_chemical_melting_point           ? 
_chemical_formula_moiety          ? 
_chemical_formula_sum 
 'C36 H38 F6 N2 O6 S3' 
_chemical_formula_weight          804.86 
 
loop_ 
 _atom_type_symbol 
 _atom_type_description 
 _atom_type_scat_dispersion_real 
 _atom_type_scat_dispersion_imag 
 _atom_type_scat_source 
 'C'  'C'    .0033    .0016 
 'International Tables Vol C Tables 4.2.6.8 and 6.1.1.4' 
 'H'  'H'    .0000    .0000 
 'International Tables Vol C Tables 4.2.6.8 and 6.1.1.4' 
 'N'  'N'    .0061    .0033 
 'International Tables Vol C Tables 4.2.6.8 and 6.1.1.4' 
 'O'  'O'    .0106    .0060 
 'International Tables Vol C Tables 4.2.6.8 and 6.1.1.4' 
 'F'  'F'    .0171    .0103 
 'International Tables Vol C Tables 4.2.6.8 and 6.1.1.4' 
 'S'  'S'    .1246    .1234 
 'International Tables Vol C Tables 4.2.6.8 and 6.1.1.4' 
 
_symmetry_cell_setting            triclinic 
_symmetry_space_group_name_H-M    P-1 
 
loop_ 
 _symmetry_equiv_pos_as_xyz 
 'x, y, z' 
 '-x, -y, -z' 
 
_cell_length_a                    11.287(2) 
_cell_length_b                    12.121(2) 
_cell_length_c                    14.544(3) 
_cell_angle_alpha                 83.80(3) 
_cell_angle_beta                  89.35(3) 
_cell_angle_gamma                 72.99(3) 
_cell_volume                      1891.1(7) 
_cell_formula_units_Z             2 
_cell_measurement_temperature     150(2) 
_cell_measurement_reflns_used     15689 
_cell_measurement_theta_min       1.00 
_cell_measurement_theta_max       27.50
 
_exptl_crystal_description        'block' 
_exptl_crystal_colour             'colorless' 
_exptl_crystal_size_max           0.15 
_exptl_crystal_size_mid           0.11 
_exptl_crystal_size_min           0.10 
_exptl_crystal_density_meas       ? 
_exptl_crystal_density_diffrn     1.413 
_exptl_crystal_density_method     'not measured' 
_exptl_crystal_F_000              836 
_exptl_absorpt_coefficient_mu     0.273 
_exptl_absorpt_correction_type    'multi-scan' 
_exptl_absorpt_correction_T_min   0.9603 
_exptl_absorpt_correction_T_max   0.9733 
_exptl_absorpt_process_details    'SAINT' 
 
_exptl_special_details 
; 
 ? 
; 
 
_diffrn_ambient_temperature       150(2) 
_diffrn_radiation_wavelength      0.71073 
_diffrn_radiation_type            MoK\a 
_diffrn_radiation_source          'fine-focus sealed tube' 
_diffrn_radiation_monochromator   graphite 
_diffrn_measurement_device_type   'Bruker APEX 11 CCD' 
_diffrn_measurement_method        '\f scans, and \w scans' 
_diffrn_detector_area_resol_mean  ? 
_diffrn_standards_number          ? 
_diffrn_standards_interval_count  ? 
_diffrn_standards_interval_time   ? 
_diffrn_standards_decay_%         ? 
_diffrn_reflns_number             13247 
_diffrn_reflns_av_R_equivalents   0.0494 
_diffrn_reflns_av_sigmaI/netI     0.0803 
_diffrn_reflns_limit_h_min        -13 
_diffrn_reflns_limit_h_max        13 
_diffrn_reflns_limit_k_min        -14 
_diffrn_reflns_limit_k_max        14 
_diffrn_reflns_limit_l_min        -17 
_diffrn_reflns_limit_l_max        17 
_diffrn_reflns_theta_min          1.41 
_diffrn_reflns_theta_max          25.03 
_reflns_number_total              6372 
_reflns_number_gt                 4028 
_reflns_threshold_expression      >2sigma(I) 
 
_computing_data_collection        'APEX2' 
_computing_cell_refinement        'SAINT' 
_computing_data_reduction         'SAINT' 
_computing_structure_solution     'SHELXS-97 (Sheldrick, 1990)' 
_computing_structure_refinement   'SHELXL-97 (Sheldrick, 1997)' 
_computing_molecular_graphics     'SHELXTL/PC (Sheldrick, 2001)' 
_computing_publication_material   'SHELXTL/PC'
 
_refine_special_details 
; 
 Refinement of F^2^ against ALL reflections.  The weighted R-factor wR and 
 goodness of fit S are based on F^2^, conventional R-factors R are based 
 on F, with F set to zero for negative F^2^. The threshold expression of 
 F^2^ > 2sigma(F^2^) is used only for calculating R-factors(gt) etc. and is 
 not relevant to the choice of reflections for refinement.  R-factors based 
 on F^2^ are statistically about twice as large as those based on F, and R- 
 factors based on ALL data will be even larger. 
; 
 
_refine_ls_structure_factor_coef  Fsqd  
_refine_ls_matrix_type            full 
_refine_ls_weighting_scheme       calc  
_refine_ls_weighting_details 
 'calc w=1/[\s^2^(Fo^2^)+(0.1058P)^2^+0.0000P] where P=(Fo^2^+2Fc^2^)/3' 
_atom_sites_solution_primary      direct 
_atom_sites_solution_secondary    difmap 
_atom_sites_solution_hydrogens    geom 
_refine_ls_hydrogen_treatment     constr 
_refine_ls_extinction_method      none 
_refine_ls_extinction_coef        ? 
_refine_ls_number_reflns          6372 
_refine_ls_number_parameters      535 
_refine_ls_number_restraints      25 
_refine_ls_R_factor_all           0.1045 
_refine_ls_R_factor_gt            0.0664 
_refine_ls_wR_factor_ref          0.1914 
_refine_ls_wR_factor_gt           0.1712 
_refine_ls_goodness_of_fit_ref    1.013 
_refine_ls_restrained_S_all       1.024 
_refine_ls_shift/su_max           0.001 
_refine_ls_shift/su_mean          0.000 
 
loop_ 
 _atom_site_label 
 _atom_site_type_symbol 
 _atom_site_fract_x 
 _atom_site_fract_y 
 _atom_site_fract_z 
 _atom_site_U_iso_or_equiv 
 _atom_site_adp_type 
 _atom_site_occupancy 
 _atom_site_symmetry_multiplicity 
 _atom_site_calc_flag 
 _atom_site_refinement_flags 
 _atom_site_disorder_assembly 
 _atom_site_disorder_group 
S1 S 0.93955(10) 0.44466(9) 0.10546(7) 0.0305(3) Uani 1 1 d . . . 
C54 C 0.5804(4) 0.5525(4) 0.3410(3) 0.0305(10) Uani 1 1 d . B . 
N1 N 1.1516(3) 0.5264(3) 0.1829(2) 0.0249(7) Uani 1 1 d . . . 
N2 N 0.7643(3) 0.3827(3) 0.2636(2) 0.0284(8) Uani 1 1 d . . . 
C36 C 1.2342(3) 0.4710(3) 0.1229(3) 0.0274(9) Uani 1 1 d . . . 
H36A H 1.2273 0.5005 0.0594 0.033 Uiso 1 1 calc R . . 
C2 C 1.0385(3) 0.6192(3) 0.1464(3) 0.0255(9) Uani 1 1 d . . . 
H2A H 1.0485 0.6353 0.0783 0.031 Uiso 1 1 calc R . . 
C33 C 1.2587(3) 0.3949(3) 0.3067(3) 0.0278(9) Uani 1 1 d . . . 
H33A H 1.2687 0.3721 0.3714 0.033 Uiso 1 1 calc R . . 
C11 C 0.9754(3) 0.3245(3) 0.1976(3) 0.0252(9) Uani 1 1 d . . . 
H11A H 1.0094 0.3485 0.2528 0.030 Uiso 1 1 calc R . . 
C12 C 0.8614(3) 0.2873(3) 0.2251(3) 0.0269(9) Uani 1 1 d . . . 
H12A H 0.8257 0.2696 0.1677 0.032 Uiso 1 1 calc R . . 
C1 C 0.9237(4) 0.5768(3) 0.1599(3) 0.0266(9) Uani 1 1 d . . . 
H1A H 0.9115 0.5607 0.2277 0.032 Uiso 1 1 calc R . . 
C32 C 1.1666(4) 0.4911(3) 0.2741(3) 0.0273(9) Uani 1 1 d . . . 
H32A H 1.1120 0.5341 0.3163 0.033 Uiso 1 1 calc R . . 
C3 C 1.0225(4) 0.7316(3) 0.1886(3) 0.0291(9) Uani 1 1 d . . . 
H3A H 1.0973 0.7577 0.1781 0.035 Uiso 1 1 calc R . . 
H3B H 1.0114 0.7191 0.2561 0.035 Uiso 1 1 calc R . . 
C34 C 1.3394(3) 0.3289(3) 0.2453(3) 0.0257(9) Uani 1 1 d . . . 
C6 C 0.8106(4) 0.6698(3) 0.1186(3) 0.0344(10) Uani 1 1 d . . . 
H6A H 0.7361 0.6436 0.1311 0.041 Uiso 1 1 calc R . . 
H6B H 0.8190 0.6814 0.0507 0.041 Uiso 1 1 calc R . . 
C35 C 1.3278(3) 0.3731(3) 0.1522(3) 0.0271(9) Uani 1 1 d . . . 
H35A H 1.3851 0.3352 0.1090 0.033 Uiso 1 1 calc R . . 
C16 C 1.0738(4) 0.2225(3) 0.1622(3) 0.0320(10) Uani 1 1 d . . . 
H16A H 1.0431 0.2036 0.1041 0.038 Uiso 1 1 calc R . . 
H16B H 1.1499 0.2453 0.1482 0.038 Uiso 1 1 calc R . . 
C13 C 0.8909(4) 0.1782(4) 0.2935(3) 0.0354(10) Uani 1 1 d . . . 
H13A H 0.8147 0.1547 0.3055 0.043 Uiso 1 1 calc R . . 
H13B H 0.9209 0.1944 0.3528 0.043 Uiso 1 1 calc R . . 
C15 C 1.1044(4) 0.1167(4) 0.2319(3) 0.0396(11) Uani 1 1 d . . . 
H15A H 1.1394 0.1340 0.2889 0.048 Uiso 1 1 calc R . . 
H15B H 1.1676 0.0526 0.2066 0.048 Uiso 1 1 calc R . . 
C41 C 1.4240(4) 0.2133(3) 0.2771(3) 0.0281(9) Uani 1 1 d . . . 
C52 C 0.7848(4) 0.4181(4) 0.3456(3) 0.0336(10) Uani 1 1 d . . . 
H52A H 0.8625 0.3840 0.3768 0.040 Uiso 1 1 calc R . . 
C53 C 0.6962(4) 0.5016(4) 0.3843(3) 0.0352(10) Uani 1 1 d . . . 
H53A H 0.7136 0.5255 0.4414 0.042 Uiso 1 1 calc R . . 
C14 C 0.9897(4) 0.0798(4) 0.2550(3) 0.0414(11) Uani 1 1 d . . . 
H14A H 1.0112 0.0106 0.3014 0.050 Uiso 1 1 calc R . . 
H14B H 0.9569 0.0589 0.1987 0.050 Uiso 1 1 calc R . . 
C4 C 0.9099(4) 0.8235(3) 0.1444(3) 0.0373(11) Uani 1 1 d . . . 
H4A H 0.9234 0.8386 0.0774 0.045 Uiso 1 1 calc R . . 
H4B H 0.8985 0.8967 0.1724 0.045 Uiso 1 1 calc R . . 
C55 C 0.5641(4) 0.5166(4) 0.2554(3) 0.0341(10) Uani 1 1 d . . . 
H55A H 0.4880 0.5508 0.2220 0.041 Uiso 1 1 calc R . . 
C56 C 0.6559(4) 0.4327(4) 0.2184(3) 0.0343(10) Uani 1 1 d . . . 
H56A H 0.6424 0.4098 0.1599 0.041 Uiso 1 1 calc R . . 
C42 C 1.3907(4) 0.1460(4) 0.3509(3) 0.0352(10) Uani 1 1 d . . . 
H42A H 1.3177 0.1777 0.3839 0.042 Uiso 1 1 calc R . . 
C43 C 1.4621(4) 0.0344(4) 0.3761(3) 0.0408(11) Uani 1 1 d . . . 
H43A H 1.4373 -0.0110 0.4258 0.049 Uiso 1 1 calc R . . 
C46 C 1.5329(4) 0.1659(4) 0.2304(3) 0.0335(10) Uani 1 1 d . . . 
H46A H 1.5574 0.2105 0.1800 0.040 Uiso 1 1 calc R . . 
C5 C 0.7936(4) 0.7843(4) 0.1580(3) 0.0414(11) Uani 1 1 d . . . 
H5A H 0.7762 0.7751 0.2249 0.050 Uiso 1 1 calc R . . 
H5B H 0.7219 0.8440 0.1268 0.050 Uiso 1 1 calc R . . 
C45 C 1.6047(4) 0.0539(4) 0.2580(3) 0.0432(12) Uani 1 1 d . . . 
H45A H 1.6793 0.0221 0.2269 0.052 Uiso 1 1 calc R . . 
C44 C 1.5693(4) -0.0127(4) 0.3302(3) 0.0451(12) Uani 1 1 d . . . 
H44A H 1.6185 -0.0901 0.3481 0.054 Uiso 1 1 calc R . . 
S2 S 0.90920(10) 0.69994(9) 0.48224(7) 0.0309(3) Uani 1 1 d . . . 
F1 F 0.8677(2) 0.8835(2) 0.36045(16) 0.0450(7) Uani 1 1 d . . . 
F2 F 0.8034(3) 0.9199(2) 0.49566(19) 0.0602(8) Uani 1 1 d . . . 
O1 O 0.9404(3) 0.6852(3) 0.57866(18) 0.0384(7) Uani 1 1 d . . . 
F3 F 0.9961(3) 0.8789(3) 0.4678(2) 0.0611(8) Uani 1 1 d . . . 
C60 C 0.8944(4) 0.8518(4) 0.4501(3) 0.0338(10) Uani 1 1 d . . . 
O3 O 0.7884(3) 0.6929(3) 0.4635(2) 0.0521(9) Uani 1 1 d . . . 
O2 O 1.0057(4) 0.6426(3) 0.4250(2) 0.0694(12) Uani 1 1 d . . . 
C21 C 0.4823(4) 0.6386(4) 0.3844(3) 0.0308(10) Uani 1 1 d . . . 
C24 C 0.2922(5) 0.7983(4) 0.4678(4) 0.0473(12) Uani 1 1 d . . . 
H24 H 0.2287 0.8491 0.4995 0.057 Uiso 1 1 calc R A 1 
C25 C 0.411(3) 0.765(3) 0.4990(19) 0.023(5) Uani 0.36(4) 1 d PU B 1 
H25A H 0.4312 0.7965 0.5516 0.028 Uiso 0.36(4) 1 calc PR B 1 
C26 C 0.495(3) 0.693(2) 0.460(2) 0.026(5) Uani 0.36(4) 1 d PU B 1 
H26A H 0.5761 0.6751 0.4859 0.031 Uiso 0.36(4) 1 calc PR B 1 
C22 C 0.3605(13) 0.678(2) 0.3440(11) 0.051(4) Uani 0.64(4) 1 d P B 1 
H22A H 0.3448 0.6503 0.2879 0.061 Uiso 0.64(4) 1 calc PR B 1 
C23 C 0.2647(15) 0.755(2) 0.3856(12) 0.064(5) Uani 0.64(4) 1 d P B 1 
H23A H 0.1830 0.7788 0.3600 0.077 Uiso 0.64(4) 1 calc PR B 1 
C25A C 0.398(2) 0.737(2) 0.5189(16) 0.046(5) Uani 0.64(4) 1 d P B 2 
H25B H 0.4047 0.7488 0.5818 0.056 Uiso 0.64(4) 1 calc PR B 2 
C26A C 0.4973(18) 0.654(2) 0.4771(15) 0.042(4) Uani 0.64(4) 1 d P B 2 
H26B H 0.5704 0.6112 0.5115 0.051 Uiso 0.64(4) 1 calc PR B 2 
C22A C 0.387(3) 0.718(2) 0.332(2) 0.051(7) Uani 0.36(4) 1 d P B 2 
H22B H 0.3834 0.7183 0.2672 0.061 Uiso 0.36(4) 1 calc PR B 2 
C23A C 0.297(3) 0.797(2) 0.3779(19) 0.048(6) Uani 0.36(4) 1 d P B 2 
H23B H 0.2356 0.8548 0.3410 0.058 Uiso 0.36(4) 1 calc PR B 2 
O4 O 1.3271(3) -0.3262(3) 0.1166(2) 0.0541(9) Uani 1 1 d D . . 
C70 C 1.3373(7) -0.1273(5) 0.0458(5) 0.095(2) Uiso 1 1 d D . . 
S3 S 1.3767(4) -0.2816(3) 0.0368(2) 0.0400(9) Uani 0.616(6) 1 d PD C 1 
O6 O 1.3173(8) -0.2770(8) -0.0501(5) 0.078(3) Uani 0.616(6) 1 d PD C 1 
O5 O 1.5076(5) -0.3216(7) 0.0345(4) 0.081(2) Uani 0.616(6) 1 d PD C 1 
F5 F 1.3965(8) -0.0735(7) -0.0148(6) 0.131(3) Uiso 0.616(6) 1 d PD C 1 
F4 F 1.2136(7) -0.0832(6) 0.0596(5) 0.115(3) Uiso 0.616(6) 1 d PD C 1 
F6 F 1.3928(7) -0.1112(6) 0.1237(5) 0.108(2) Uiso 0.616(6) 1 d PD C 1 
S3A S 1.3178(6) -0.2722(5) 0.0256(4) 0.0476(15) Uani 0.384(6) 1 d PD C 2 
O6A O 1.1957(8) -0.2522(13) -0.0086(7) 0.097(5) Uani 0.384(6) 1 d PD C 2 
O5A O 1.4110(12) -0.3173(9) -0.0390(9) 0.069(4) Uani 0.384(6) 1 d PD C 2 
F5A F 1.3101(9) -0.0635(8) -0.0366(6) 0.081(3) Uiso 0.384(6) 1 d PD C 2 
F4A F 1.2846(15) -0.0741(12) 0.1102(9) 0.146(5) Uiso 0.384(6) 1 d PD C 2 
F6A F 1.4613(15) -0.1577(14) 0.0698(11) 0.158(6) Uiso 0.384(6) 1 d P C 2 
 
loop_ 
 _atom_site_aniso_label 
 _atom_site_aniso_U_11 
 _atom_site_aniso_U_22 
 _atom_site_aniso_U_33 
 _atom_site_aniso_U_23 
 _atom_site_aniso_U_13 
 _atom_site_aniso_U_12 
S1 0.0481(7) 0.0237(6) 0.0208(5) -0.0020(4) 0.0002(4) -0.0121(5) 
C54 0.034(2) 0.033(2) 0.029(2) -0.0036(19) 0.0028(18) -0.0160(19) 
N1 0.0267(18) 0.0266(18) 0.0220(17) -0.0039(14) 0.0039(14) -0.0087(14) 
N2 0.0287(19) 0.035(2) 0.0247(18) -0.0053(15) 0.0019(15) -0.0130(15) 
C36 0.032(2) 0.032(2) 0.020(2) -0.0029(17) 0.0064(17) -0.0119(19) 
C2 0.030(2) 0.022(2) 0.022(2) -0.0005(16) 0.0029(17) -0.0044(17) 
C33 0.029(2) 0.034(2) 0.021(2) -0.0028(18) 0.0021(17) -0.0119(19) 
C11 0.033(2) 0.023(2) 0.021(2) -0.0020(16) 0.0019(16) -0.0110(17) 
C12 0.032(2) 0.030(2) 0.021(2) -0.0067(17) 0.0029(17) -0.0109(18) 
C1 0.036(2) 0.022(2) 0.022(2) -0.0048(17) 0.0041(17) -0.0074(17) 
C32 0.033(2) 0.032(2) 0.018(2) -0.0037(17) 0.0040(17) -0.0103(19) 
C3 0.039(2) 0.023(2) 0.028(2) -0.0054(17) 0.0044(18) -0.0125(18) 
C34 0.025(2) 0.031(2) 0.023(2) -0.0024(17) 0.0017(17) -0.0129(18) 
C6 0.033(2) 0.028(2) 0.038(2) 0.0002(19) -0.0033(19) -0.0051(19) 
C35 0.025(2) 0.029(2) 0.026(2) -0.0063(18) 0.0052(17) -0.0064(18) 
C16 0.036(2) 0.025(2) 0.035(2) -0.0044(18) 0.0105(19) -0.0075(18) 
C13 0.045(3) 0.033(2) 0.032(2) -0.0006(19) 0.008(2) -0.019(2) 
C15 0.043(3) 0.026(2) 0.046(3) -0.002(2) 0.006(2) -0.006(2) 
C41 0.029(2) 0.030(2) 0.027(2) -0.0054(18) 0.0000(17) -0.0102(18) 
C52 0.032(2) 0.043(3) 0.029(2) -0.009(2) -0.0020(18) -0.014(2) 
C53 0.030(2) 0.046(3) 0.034(2) -0.016(2) 0.0017(19) -0.013(2) 
C14 0.059(3) 0.024(2) 0.042(3) 0.000(2) 0.008(2) -0.015(2) 
C4 0.053(3) 0.021(2) 0.036(2) -0.0071(19) 0.001(2) -0.006(2) 
C55 0.029(2) 0.043(3) 0.030(2) -0.005(2) -0.0006(18) -0.010(2) 
C56 0.034(2) 0.042(3) 0.027(2) -0.008(2) -0.0021(19) -0.011(2) 
C42 0.029(2) 0.037(3) 0.035(2) -0.002(2) 0.0012(19) -0.0036(19) 
C43 0.039(3) 0.039(3) 0.039(3) 0.006(2) -0.003(2) -0.006(2) 
C46 0.027(2) 0.037(3) 0.034(2) -0.005(2) 0.0069(19) -0.0062(19) 
C5 0.041(3) 0.029(3) 0.048(3) -0.003(2) -0.002(2) -0.001(2) 
C45 0.030(3) 0.043(3) 0.049(3) -0.008(2) 0.002(2) 0.001(2) 
C44 0.040(3) 0.032(3) 0.056(3) 0.002(2) -0.010(2) -0.002(2) 
S2 0.0384(6) 0.0290(6) 0.0246(6) -0.0038(4) 0.0066(4) -0.0088(5) 
F1 0.0581(17) 0.0421(16) 0.0316(14) 0.0074(12) 0.0011(12) -0.0135(13) 
F2 0.082(2) 0.0338(16) 0.0595(19) -0.0104(14) 0.0330(16) -0.0076(14) 
O1 0.0408(18) 0.0468(19) 0.0262(16) 0.0055(14) -0.0019(13) -0.0139(14) 
F3 0.0658(19) 0.068(2) 0.0620(19) 0.0100(16) -0.0091(15) -0.0440(16) 
C60 0.036(3) 0.037(3) 0.030(2) -0.003(2) 0.0057(19) -0.014(2) 
O3 0.059(2) 0.058(2) 0.049(2) 0.0056(17) -0.0166(16) -0.0348(17) 
O2 0.097(3) 0.038(2) 0.058(2) -0.0035(17) 0.051(2) 0.0031(19) 
C21 0.022(2) 0.036(3) 0.037(2) -0.007(2) 0.0043(18) -0.0102(19) 
C24 0.046(3) 0.048(3) 0.048(3) -0.015(2) 0.013(2) -0.009(2) 
C25 0.037(13) 0.029(10) 0.016(10) -0.006(7) 0.010(8) -0.029(8) 
C26 0.026(8) 0.007(11) 0.037(12) 0.003(8) -0.022(8) 0.007(8) 
C22 0.034(6) 0.066(11) 0.049(7) -0.030(7) -0.001(5) 0.000(6) 
C23 0.028(6) 0.100(13) 0.065(8) -0.049(9) -0.004(6) -0.005(7) 
C25A 0.040(7) 0.069(13) 0.043(9) -0.018(9) 0.021(7) -0.033(8) 
C26A 0.038(6) 0.043(11) 0.038(8) -0.008(8) -0.007(5) 0.002(8) 
C22A 0.087(19) 0.030(11) 0.043(10) -0.007(8) -0.001(10) -0.025(10) 
C23A 0.029(13) 0.042(12) 0.065(12) -0.011(10) -0.007(9) 0.005(8) 
O4 0.062(2) 0.069(2) 0.0371(19) -0.0023(17) 0.0127(16) -0.0303(19) 
S3 0.054(2) 0.0422(14) 0.0262(14) -0.0086(10) 0.0034(16) -0.0162(16) 
O6 0.091(7) 0.128(7) 0.027(4) -0.025(4) -0.010(4) -0.042(5) 
O5 0.041(4) 0.142(7) 0.060(4) -0.024(4) 0.020(3) -0.021(4) 
S3A 0.056(4) 0.051(3) 0.036(3) -0.0080(18) 0.002(3) -0.015(3) 
O6A 0.058(7) 0.181(14) 0.053(7) -0.013(7) -0.003(6) -0.038(7) 
O5A 0.096(10) 0.059(7) 0.063(8) -0.027(6) 0.053(8) -0.034(7) 
 
_geom_special_details 
; 
 All esds (except the esd in the dihedral angle between two l.s. planes) 
 are estimated using the full covariance matrix.  The cell esds are taken 
 into account individually in the estimation of esds in distances, angles 
 and torsion angles; correlations between esds in cell parameters are only 
 used when they are defined by crystal symmetry.  An approximate (isotropic) 
 treatment of cell esds is used for estimating esds involving l.s. planes. 
; 
 
loop_ 
 _geom_bond_atom_site_label_1 
 _geom_bond_atom_site_label_2 
 _geom_bond_distance 
 _geom_bond_site_symmetry_2 
 _geom_bond_publ_flag 
S1 C11 1.824(4) . ? 
S1 C1 1.824(4) . ? 
C54 C55 1.395(5) . ? 
C54 C53 1.396(6) . ? 
C54 C21 1.471(6) . ? 
N1 C32 1.346(5) . ? 
N1 C36 1.350(5) . ? 
N1 C2 1.490(5) . ? 
N2 C56 1.339(5) . ? 
N2 C52 1.354(5) . ? 
N2 C12 1.496(5) . ? 
C36 C35 1.369(5) . ? 
C36 H36A 0.9500 . ? 
C2 C3 1.517(5) . ? 
C2 C1 1.530(5) . ? 
C2 H2A 1.0000 . ? 
C33 C32 1.359(5) . ? 
C33 C34 1.406(5) . ? 
C33 H33A 0.9500 . ? 
C11 C12 1.519(5) . ? 
C11 C16 1.533(5) . ? 
C11 H11A 1.0000 . ? 
C12 C13 1.521(5) . ? 
C12 H12A 1.0000 . ? 
C1 C6 1.514(5) . ? 
C1 H1A 1.0000 . ? 
C32 H32A 0.9500 . ? 
C3 C4 1.518(6) . ? 
C3 H3A 0.9900 . ? 
C3 H3B 0.9900 . ? 
C34 C35 1.394(5) . ? 
C34 C41 1.476(6) . ? 
C6 C5 1.519(6) . ? 
C6 H6A 0.9900 . ? 
C6 H6B 0.9900 . ? 
C35 H35A 0.9500 . ? 
C16 C15 1.502(6) . ? 
C16 H16A 0.9900 . ? 
C16 H16B 0.9900 . ? 
C13 C14 1.527(6) . ? 
C13 H13A 0.9900 . ? 
C13 H13B 0.9900 . ? 
C15 C14 1.512(6) . ? 
C15 H15A 0.9900 . ? 
C15 H15B 0.9900 . ? 
C41 C42 1.393(6) . ? 
C41 C46 1.398(5) . ? 
C52 C53 1.363(6) . ? 
C52 H52A 0.9500 . ? 
C53 H53A 0.9500 . ? 
C14 H14A 0.9900 . ? 
C14 H14B 0.9900 . ? 
C4 C5 1.526(6) . ? 
C4 H4A 0.9900 . ? 
C4 H4B 0.9900 . ? 
C55 C56 1.374(6) . ? 
C55 H55A 0.9500 . ? 
C56 H56A 0.9500 . ? 
C42 C43 1.369(6) . ? 
C42 H42A 0.9500 . ? 
C43 C44 1.377(6) . ? 
C43 H43A 0.9500 . ? 
C46 C45 1.381(6) . ? 
C46 H46A 0.9500 . ? 
C5 H5A 0.9900 . ? 
C5 H5B 0.9900 . ? 
C45 C44 1.382(6) . ? 
C45 H45A 0.9500 . ? 
C44 H44A 0.9500 . ? 
S2 O2 1.422(3) . ? 
S2 O3 1.423(3) . ? 
S2 O1 1.429(3) . ? 
S2 C60 1.809(4) . ? 
F1 C60 1.331(5) . ? 
F2 C60 1.335(5) . ? 
F3 C60 1.318(5) . ? 
C21 C26 1.37(3) . ? 
C21 C22A 1.38(3) . ? 
C21 C26A 1.40(2) . ? 
C21 C22 1.427(15) . ? 
C24 C23A 1.31(3) . ? 
C24 C25 1.35(4) . ? 
C24 C25A 1.38(3) . ? 
C24 C23 1.427(15) . ? 
C24 H24 0.9500 . ? 
C25 C26 1.26(5) . ? 
C25 H25A 0.9500 . ? 
C26 H26A 0.9500 . ? 
C22 C23 1.39(2) . ? 
C22 H22A 0.9500 . ? 
C23 H23A 0.9500 . ? 
C25A C26A 1.45(3) . ? 
C25A H25B 0.9500 . ? 
C26A H26B 0.9500 . ? 
C22A C23A 1.40(4) . ? 
C22A H22B 0.9500 . ? 
C23A H23B 0.9500 . ? 
O4 S3A 1.402(7) . ? 
O4 S3 1.407(4) . ? 
C70 F4A 1.242(9) . ? 
C70 F5 1.329(7) . ? 
C70 F5A 1.340(8) . ? 
C70 F6 1.360(6) . ? 
C70 F4 1.362(7) . ? 
C70 F6A 1.377(16) . ? 
C70 S3 1.811(6) . ? 
C70 S3A 1.886(7) . ? 
S3 O5 1.415(6) . ? 
S3 O6 1.425(6) . ? 
S3A O6A 1.414(8) . ? 
S3A O5A 1.428(8) . ? 
 
loop_ 
 _geom_angle_atom_site_label_1 
 _geom_angle_atom_site_label_2 
 _geom_angle_atom_site_label_3 
 _geom_angle 
 _geom_angle_site_symmetry_1 
 _geom_angle_site_symmetry_3 
 _geom_angle_publ_flag 
C11 S1 C1 106.92(18) . . ? 
C55 C54 C53 116.1(4) . . ? 
C55 C54 C21 122.7(4) . . ? 
C53 C54 C21 121.3(4) . . ? 
C32 N1 C36 119.8(3) . . ? 
C32 N1 C2 120.6(3) . . ? 
C36 N1 C2 119.3(3) . . ? 
C56 N2 C52 119.4(4) . . ? 
C56 N2 C12 120.6(3) . . ? 
C52 N2 C12 120.0(3) . . ? 
N1 C36 C35 121.1(4) . . ? 
N1 C36 H36A 119.4 . . ? 
C35 C36 H36A 119.4 . . ? 
N1 C2 C3 112.3(3) . . ? 
N1 C2 C1 110.4(3) . . ? 
C3 C2 C1 111.5(3) . . ? 
N1 C2 H2A 107.5 . . ? 
C3 C2 H2A 107.5 . . ? 
C1 C2 H2A 107.5 . . ? 
C32 C33 C34 120.4(4) . . ? 
C32 C33 H33A 119.8 . . ? 
C34 C33 H33A 119.8 . . ? 
C12 C11 C16 109.4(3) . . ? 
C12 C11 S1 111.6(3) . . ? 
C16 C11 S1 107.8(3) . . ? 
C12 C11 H11A 109.3 . . ? 
C16 C11 H11A 109.3 . . ? 
S1 C11 H11A 109.3 . . ? 
N2 C12 C11 111.4(3) . . ? 
N2 C12 C13 109.7(3) . . ? 
C11 C12 C13 112.9(3) . . ? 
N2 C12 H12A 107.5 . . ? 
C11 C12 H12A 107.5 . . ? 
C13 C12 H12A 107.5 . . ? 
C6 C1 C2 109.8(3) . . ? 
C6 C1 S1 108.6(3) . . ? 
C2 C1 S1 111.8(3) . . ? 
C6 C1 H1A 108.9 . . ? 
C2 C1 H1A 108.9 . . ? 
S1 C1 H1A 108.9 . . ? 
N1 C32 C33 121.1(4) . . ? 
N1 C32 H32A 119.4 . . ? 
C33 C32 H32A 119.4 . . ? 
C2 C3 C4 109.3(3) . . ? 
C2 C3 H3A 109.8 . . ? 
C4 C3 H3A 109.8 . . ? 
C2 C3 H3B 109.8 . . ? 
C4 C3 H3B 109.8 . . ? 
H3A C3 H3B 108.3 . . ? 
C35 C34 C33 117.0(4) . . ? 
C35 C34 C41 121.8(4) . . ? 
C33 C34 C41 121.0(3) . . ? 
C1 C6 C5 111.8(3) . . ? 
C1 C6 H6A 109.3 . . ? 
C5 C6 H6A 109.3 . . ? 
C1 C6 H6B 109.3 . . ? 
C5 C6 H6B 109.3 . . ? 
H6A C6 H6B 107.9 . . ? 
C36 C35 C34 120.1(4) . . ? 
C36 C35 H35A 119.9 . . ? 
C34 C35 H35A 119.9 . . ? 
C15 C16 C11 111.7(3) . . ? 
C15 C16 H16A 109.3 . . ? 
C11 C16 H16A 109.3 . . ? 
C15 C16 H16B 109.3 . . ? 
C11 C16 H16B 109.3 . . ? 
H16A C16 H16B 107.9 . . ? 
C12 C13 C14 110.3(3) . . ? 
C12 C13 H13A 109.6 . . ? 
C14 C13 H13A 109.6 . . ? 
C12 C13 H13B 109.6 . . ? 
C14 C13 H13B 109.6 . . ? 
H13A C13 H13B 108.1 . . ? 
C16 C15 C14 110.6(4) . . ? 
C16 C15 H15A 109.5 . . ? 
C14 C15 H15A 109.5 . . ? 
C16 C15 H15B 109.5 . . ? 
C14 C15 H15B 109.5 . . ? 
H15A C15 H15B 108.1 . . ? 
C42 C41 C46 118.9(4) . . ? 
C42 C41 C34 119.6(4) . . ? 
C46 C41 C34 121.3(4) . . ? 
N2 C52 C53 121.4(4) . . ? 
N2 C52 H52A 119.3 . . ? 
C53 C52 H52A 119.3 . . ? 
C52 C53 C54 120.9(4) . . ? 
C52 C53 H53A 119.6 . . ? 
C54 C53 H53A 119.6 . . ? 
C15 C14 C13 110.2(4) . . ? 
C15 C14 H14A 109.6 . . ? 
C13 C14 H14A 109.6 . . ? 
C15 C14 H14B 109.6 . . ? 
C13 C14 H14B 109.6 . . ? 
H14A C14 H14B 108.1 . . ? 
C3 C4 C5 110.8(4) . . ? 
C3 C4 H4A 109.5 . . ? 
C5 C4 H4A 109.5 . . ? 
C3 C4 H4B 109.5 . . ? 
C5 C4 H4B 109.5 . . ? 
H4A C4 H4B 108.1 . . ? 
C56 C55 C54 121.2(4) . . ? 
C56 C55 H55A 119.4 . . ? 
C54 C55 H55A 119.4 . . ? 
N2 C56 C55 121.0(4) . . ? 
N2 C56 H56A 119.5 . . ? 
C55 C56 H56A 119.5 . . ? 
C43 C42 C41 120.6(4) . . ? 
C43 C42 H42A 119.7 . . ? 
C41 C42 H42A 119.7 . . ? 
C42 C43 C44 120.7(4) . . ? 
C42 C43 H43A 119.6 . . ? 
C44 C43 H43A 119.6 . . ? 
C45 C46 C41 119.6(4) . . ? 
C45 C46 H46A 120.2 . . ? 
C41 C46 H46A 120.2 . . ? 
C6 C5 C4 110.4(3) . . ? 
C6 C5 H5A 109.6 . . ? 
C4 C5 H5A 109.6 . . ? 
C6 C5 H5B 109.6 . . ? 
C4 C5 H5B 109.6 . . ? 
H5A C5 H5B 108.1 . . ? 
C46 C45 C44 120.9(4) . . ? 
C46 C45 H45A 119.5 . . ? 
C44 C45 H45A 119.5 . . ? 
C43 C44 C45 119.3(4) . . ? 
C43 C44 H44A 120.3 . . ? 
C45 C44 H44A 120.3 . . ? 
O2 S2 O3 116.7(2) . . ? 
O2 S2 O1 115.1(2) . . ? 
O3 S2 O1 113.67(18) . . ? 
O2 S2 C60 103.15(19) . . ? 
O3 S2 C60 102.9(2) . . ? 
O1 S2 C60 102.55(19) . . ? 
F3 C60 F1 106.9(3) . . ? 
F3 C60 F2 106.8(4) . . ? 
F1 C60 F2 106.4(3) . . ? 
F3 C60 S2 112.8(3) . . ? 
F1 C60 S2 112.2(3) . . ? 
F2 C60 S2 111.4(3) . . ? 
C26 C21 C22A 104.4(17) . . ? 
C26 C21 C26A 21.1(10) . . ? 
C22A C21 C26A 118.8(15) . . ? 
C26 C21 C22 113.4(15) . . ? 
C22A C21 C22 26.8(8) . . ? 
C26A C21 C22 118.6(10) . . ? 
C26 C21 C54 126.9(13) . . ? 
C22A C21 C54 121.3(13) . . ? 
C26A C21 C54 119.0(9) . . ? 
C22 C21 C54 119.5(7) . . ? 
C23A C24 C25 106(2) . . ? 
C23A C24 C25A 117.1(16) . . ? 
C25 C24 C25A 20.2(10) . . ? 
C23A C24 C23 29.8(9) . . ? 
C25 C24 C23 118.2(15) . . ? 
C25A C24 C23 118.7(12) . . ? 
C23A C24 H24 125.2 . . ? 
C25 C24 H24 120.9 . . ? 
C25A C24 H24 116.5 . . ? 
C23 C24 H24 120.9 . . ? 
C26 C25 C24 122(3) . . ? 
C26 C25 H25A 119.2 . . ? 
C24 C25 H25A 119.2 . . ? 
C25 C26 C21 127(3) . . ? 
C25 C26 H26A 116.3 . . ? 
C21 C26 H26A 116.3 . . ? 
C23 C22 C21 120.8(12) . . ? 
C23 C22 H22A 119.6 . . ? 
C21 C22 H22A 119.6 . . ? 
C22 C23 C24 118.4(11) . . ? 
C22 C23 H23A 120.8 . . ? 
C24 C23 H23A 120.8 . . ? 
C24 C25A C26A 120.4(17) . . ? 
C24 C25A H25B 119.8 . . ? 
C26A C25A H25B 119.8 . . ? 
C21 C26A C25A 117.8(16) . . ? 
C21 C26A H26B 121.1 . . ? 
C25A C26A H26B 121.1 . . ? 
C21 C22A C23A 118(2) . . ? 
C21 C22A H22B 120.8 . . ? 
C23A C22A H22B 120.8 . . ? 
C24 C23A C22A 125(2) . . ? 
C24 C23A H23B 117.7 . . ? 
C22A C23A H23B 117.7 . . ? 
S3A O4 S3 27.15(19) . . ? 
F4A C70 F5 117.9(9) . . ? 
F4A C70 F5A 112.4(9) . . ? 
F5 C70 F5A 43.9(5) . . ? 
F4A C70 F6 53.8(8) . . ? 
F5 C70 F6 97.4(7) . . ? 
F5A C70 F6 131.9(7) . . ? 
F4A C70 F4 51.2(8) . . ? 
F5 C70 F4 121.5(7) . . ? 
F5A C70 F4 83.6(7) . . ? 
F6 C70 F4 104.8(6) . . ? 
F4A C70 F6A 104.1(11) . . ? 
F5 C70 F6A 69.9(8) . . ? 
F5A C70 F6A 113.2(9) . . ? 
F6 C70 F6A 50.4(7) . . ? 
F4 C70 F6A 155.1(9) . . ? 
F4A C70 S3 127.8(9) . . ? 
F5 C70 S3 112.6(6) . . ? 
F5A C70 S3 112.6(6) . . ? 
F6 C70 S3 108.4(5) . . ? 
F4 C70 S3 110.3(5) . . ? 
F6A C70 S3 81.1(8) . . ? 
F4A C70 S3A 121.1(9) . . ? 
F5 C70 S3A 120.5(6) . . ? 
F5A C70 S3A 104.3(6) . . ? 
F6 C70 S3A 122.3(5) . . ? 
F4 C70 S3A 91.3(5) . . ? 
F6A C70 S3A 101.5(8) . . ? 
S3 C70 S3A 20.41(15) . . ? 
O4 S3 O5 113.6(4) . . ? 
O4 S3 O6 118.1(5) . . ? 
O5 S3 O6 113.7(5) . . ? 
O4 S3 C70 104.2(3) . . ? 
O5 S3 C70 106.0(4) . . ? 
O6 S3 C70 98.6(5) . . ? 
O4 S3A O6A 108.8(6) . . ? 
O4 S3A O5A 119.6(8) . . ? 
O6A S3A O5A 113.5(10) . . ? 
O4 S3A C70 100.8(4) . . ? 
O6A S3A C70 107.7(7) . . ? 
O5A S3A C70 104.9(6) . . ? 
 
_diffrn_measured_fraction_theta_max     .953 
_diffrn_reflns_theta_full              25.03 
_diffrn_measured_fraction_theta_full    .953 
_refine_diff_density_max     .899 
_refine_diff_density_min    -.854 
_refine_diff_density_rms     .074 
 

data_7Ph 
 
_audit_creation_method            SHELXL-97 
_chemical_name_systematic 
; 
 ? 
; 
_chemical_name_common             ? 
_chemical_melting_point           ? 
_chemical_formula_moiety          ? 
_chemical_formula_sum 
 'C36 H38 F6 N2 O6 S3' 
_chemical_formula_weight          804.86 
 
loop_ 
 _atom_type_symbol 
 _atom_type_description 
 _atom_type_scat_dispersion_real 
 _atom_type_scat_dispersion_imag 
 _atom_type_scat_source 
 'C'  'C'    .0033    .0016 
 'International Tables Vol C Tables 4.2.6.8 and 6.1.1.4' 
 'H'  'H'    .0000    .0000 
 'International Tables Vol C Tables 4.2.6.8 and 6.1.1.4' 
 'N'  'N'    .0061    .0033 
 'International Tables Vol C Tables 4.2.6.8 and 6.1.1.4' 
 'O'  'O'    .0106    .0060 
 'International Tables Vol C Tables 4.2.6.8 and 6.1.1.4' 
 'F'  'F'    .0171    .0103 
 'International Tables Vol C Tables 4.2.6.8 and 6.1.1.4' 
 'S'  'S'    .1246    .1234 
 'International Tables Vol C Tables 4.2.6.8 and 6.1.1.4' 
 
_symmetry_cell_setting            triclinic 
_symmetry_space_group_name_H-M    P-1 
 
loop_ 
 _symmetry_equiv_pos_as_xyz 
 'x, y, z' 
 '-x, -y, -z' 
 
_cell_length_a                    11.287(2) 
_cell_length_b                    12.121(2) 
_cell_length_c                    14.544(3) 
_cell_angle_alpha                 83.80(3) 
_cell_angle_beta                  89.35(3) 
_cell_angle_gamma                 72.99(3) 
_cell_volume                      1891.1(7) 
_cell_formula_units_Z             2 
_cell_measurement_temperature     150(2) 
_cell_measurement_reflns_used     15689 
_cell_measurement_theta_min       1.00 
_cell_measurement_theta_max       27.50 
 
_exptl_crystal_description        'block' 
_exptl_crystal_colour             'colorless' 
_exptl_crystal_size_max           0.15 
_exptl_crystal_size_mid           0.11 
_exptl_crystal_size_min           0.10 
_exptl_crystal_density_meas       ? 
_exptl_crystal_density_diffrn     1.413 
_exptl_crystal_density_method     'not measured' 
_exptl_crystal_F_000              836 
_exptl_absorpt_coefficient_mu     0.273 
_exptl_absorpt_correction_type    'multi-scan' 
_exptl_absorpt_correction_T_min   0.9603 
_exptl_absorpt_correction_T_max   0.9733 
_exptl_absorpt_process_details    'SAINT' 
 
_exptl_special_details 
; 
 ? 
; 
 
_diffrn_ambient_temperature       150(2) 
_diffrn_radiation_wavelength      0.71073 
_diffrn_radiation_type            MoK\a 
_diffrn_radiation_source          'fine-focus sealed tube' 
_diffrn_radiation_monochromator   graphite 
_diffrn_measurement_device_type   'Bruker APEX 11 CCD' 
_diffrn_measurement_method        '\f scans, and \w scans' 
_diffrn_detector_area_resol_mean  ? 
_diffrn_standards_number          ? 
_diffrn_standards_interval_count  ? 
_diffrn_standards_interval_time   ? 
_diffrn_standards_decay_%         ? 
_diffrn_reflns_number             13247 
_diffrn_reflns_av_R_equivalents   0.0494 
_diffrn_reflns_av_sigmaI/netI     0.0803 
_diffrn_reflns_limit_h_min        -13 
_diffrn_reflns_limit_h_max        13 
_diffrn_reflns_limit_k_min        -14 
_diffrn_reflns_limit_k_max        14 
_diffrn_reflns_limit_l_min        -17 
_diffrn_reflns_limit_l_max        17 
_diffrn_reflns_theta_min          1.41 
_diffrn_reflns_theta_max          25.03 
_reflns_number_total              6372 
_reflns_number_gt                 4028 
_reflns_threshold_expression      >2sigma(I) 
 
_computing_data_collection        'APEX2' 
_computing_cell_refinement        'SAINT' 
_computing_data_reduction         'SAINT' 
_computing_structure_solution     'SHELXS-97 (Sheldrick, 1990)' 
_computing_structure_refinement   'SHELXL-97 (Sheldrick, 1997)' 
_computing_molecular_graphics     'SHELXTL/PC (Sheldrick, 2001)'  
_computing_publication_material   'SHELXTL/PC' 
 
_refine_special_details 
; 
 Refinement of F^2^ against ALL reflections.  The weighted R-factor wR and 
 goodness of fit S are based on F^2^, conventional R-factors R are based 
 on F, with F set to zero for negative F^2^. The threshold expression of 
 F^2^ > 2sigma(F^2^) is used only for calculating R-factors(gt) etc. and is 
 not relevant to the choice of reflections for refinement.  R-factors based 
 on F^2^ are statistically about twice as large as those based on F, and R- 
 factors based on ALL data will be even larger. 
; 
 
_refine_ls_structure_factor_coef  Fsqd  
_refine_ls_matrix_type            full 
_refine_ls_weighting_scheme       calc  
_refine_ls_weighting_details 
 'calc w=1/[\s^2^(Fo^2^)+(0.1069P)^2^+0.0000P] where P=(Fo^2^+2Fc^2^)/3' 
_atom_sites_solution_primary      direct 
_atom_sites_solution_secondary    difmap 
_atom_sites_solution_hydrogens    geom 
_refine_ls_hydrogen_treatment     constr 
_refine_ls_extinction_method      none 
_refine_ls_extinction_coef        ? 
_refine_ls_number_reflns          6372 
_refine_ls_number_parameters      535 
_refine_ls_number_restraints      25 
_refine_ls_R_factor_all           0.1047 
_refine_ls_R_factor_gt            0.0665 
_refine_ls_wR_factor_ref          0.1926 
_refine_ls_wR_factor_gt           0.1723 
_refine_ls_goodness_of_fit_ref    1.013 
_refine_ls_restrained_S_all       1.023 
_refine_ls_shift/su_max           0.004 
_refine_ls_shift/su_mean          0.000 
 
loop_ 
 _atom_site_label 
 _atom_site_type_symbol 
 _atom_site_fract_x 
 _atom_site_fract_y 
 _atom_site_fract_z 
 _atom_site_U_iso_or_equiv 
 _atom_site_adp_type 
 _atom_site_occupancy 
 _atom_site_symmetry_multiplicity 
 _atom_site_calc_flag 
 _atom_site_refinement_flags 
 _atom_site_disorder_assembly 
 _atom_site_disorder_group 
S1 S 0.93955(10) 0.44466(9) 0.10545(7) 0.0305(3) Uani 1 1 d . . . 
C54 C 0.5804(4) 0.5525(4) 0.3410(3) 0.0305(10) Uani 1 1 d . B . 
N1 N 1.1516(3) 0.5265(3) 0.1829(2) 0.0249(7) Uani 1 1 d . . . 
N2 N 0.7643(3) 0.3827(3) 0.2636(2) 0.0285(8) Uani 1 1 d . . . 
C36 C 1.2343(3) 0.4711(3) 0.1229(3) 0.0274(9) Uani 1 1 d . . . 
H36A H 1.2273 0.5006 0.0593 0.033 Uiso 1 1 calc R . . 
C2 C 1.0385(3) 0.6192(3) 0.1464(3) 0.0255(9) Uani 1 1 d . . . 
H2A H 1.0485 0.6354 0.0783 0.031 Uiso 1 1 calc R . . 
C33 C 1.2587(3) 0.3949(3) 0.3068(3) 0.0278(9) Uani 1 1 d . . . 
H33A H 1.2686 0.3721 0.3715 0.033 Uiso 1 1 calc R . . 
C11 C 0.9754(3) 0.3246(3) 0.1976(3) 0.0252(9) Uani 1 1 d . . . 
H11A H 1.0095 0.3486 0.2528 0.030 Uiso 1 1 calc R . . 
C12 C 0.8613(3) 0.2873(3) 0.2250(3) 0.0268(9) Uani 1 1 d . . . 
H12A H 0.8256 0.2696 0.1677 0.032 Uiso 1 1 calc R . . 
C1 C 0.9237(4) 0.5768(3) 0.1599(3) 0.0266(9) Uani 1 1 d . . . 
H1A H 0.9115 0.5607 0.2277 0.032 Uiso 1 1 calc R . . 
C32 C 1.1666(4) 0.4911(3) 0.2741(3) 0.0273(9) Uani 1 1 d . . . 
H32A H 1.1120 0.5341 0.3163 0.033 Uiso 1 1 calc R . . 
C3 C 1.0225(4) 0.7316(3) 0.1886(3) 0.0291(9) Uani 1 1 d . . . 
H3A H 1.0973 0.7577 0.1781 0.035 Uiso 1 1 calc R . . 
H3B H 1.0114 0.7191 0.2561 0.035 Uiso 1 1 calc R . . 
C34 C 1.3394(3) 0.3289(3) 0.2453(3) 0.0257(9) Uani 1 1 d . . . 
C6 C 0.8106(4) 0.6698(3) 0.1186(3) 0.0344(10) Uani 1 1 d . . . 
H6A H 0.7361 0.6436 0.1311 0.041 Uiso 1 1 calc R . . 
H6B H 0.8190 0.6814 0.0507 0.041 Uiso 1 1 calc R . . 
C35 C 1.3278(3) 0.3731(3) 0.1522(3) 0.0272(9) Uani 1 1 d . . . 
H35A H 1.3850 0.3352 0.1089 0.033 Uiso 1 1 calc R . . 
C16 C 1.0738(4) 0.2225(3) 0.1622(3) 0.0321(10) Uani 1 1 d . . . 
H16A H 1.0430 0.2036 0.1042 0.039 Uiso 1 1 calc R . . 
H16B H 1.1500 0.2452 0.1482 0.039 Uiso 1 1 calc R . . 
C13 C 0.8909(4) 0.1782(4) 0.2935(3) 0.0354(10) Uani 1 1 d . . . 
H13A H 0.8148 0.1547 0.3056 0.043 Uiso 1 1 calc R . . 
H13B H 0.9210 0.1945 0.3528 0.043 Uiso 1 1 calc R . . 
C15 C 1.1043(4) 0.1168(4) 0.2319(3) 0.0395(11) Uani 1 1 d . . . 
H15A H 1.1393 0.1341 0.2889 0.047 Uiso 1 1 calc R . . 
H15B H 1.1676 0.0526 0.2067 0.047 Uiso 1 1 calc R . . 
C41 C 1.4240(4) 0.2133(3) 0.2771(3) 0.0281(9) Uani 1 1 d . . . 
C52 C 0.7848(4) 0.4181(4) 0.3456(3) 0.0335(10) Uani 1 1 d . . . 
H52A H 0.8624 0.3839 0.3768 0.040 Uiso 1 1 calc R . . 
C53 C 0.6962(4) 0.5016(4) 0.3843(3) 0.0351(10) Uani 1 1 d . . . 
H53A H 0.7137 0.5256 0.4414 0.042 Uiso 1 1 calc R . . 
C14 C 0.9897(4) 0.0798(4) 0.2550(3) 0.0415(11) Uani 1 1 d . . . 
H14A H 1.0112 0.0106 0.3013 0.050 Uiso 1 1 calc R . . 
H14B H 0.9569 0.0589 0.1986 0.050 Uiso 1 1 calc R . . 
C4 C 0.9099(4) 0.8235(3) 0.1445(3) 0.0374(11) Uani 1 1 d . . . 
H4A H 0.9233 0.8387 0.0775 0.045 Uiso 1 1 calc R . . 
H4B H 0.8985 0.8967 0.1725 0.045 Uiso 1 1 calc R . . 
C55 C 0.5641(4) 0.5166(4) 0.2554(3) 0.0341(10) Uani 1 1 d . . . 
H55A H 0.4880 0.5508 0.2220 0.041 Uiso 1 1 calc R . . 
C56 C 0.6560(4) 0.4327(4) 0.2184(3) 0.0342(10) Uani 1 1 d . . . 
H56A H 0.6425 0.4098 0.1599 0.041 Uiso 1 1 calc R . . 
C42 C 1.3906(4) 0.1460(4) 0.3509(3) 0.0352(10) Uani 1 1 d . . . 
H42A H 1.3177 0.1777 0.3839 0.042 Uiso 1 1 calc R . . 
C43 C 1.4621(4) 0.0345(4) 0.3761(3) 0.0411(11) Uani 1 1 d . . . 
H43A H 1.4374 -0.0109 0.4258 0.049 Uiso 1 1 calc R . . 
C46 C 1.5329(4) 0.1659(4) 0.2304(3) 0.0335(10) Uani 1 1 d . . . 
H46A H 1.5573 0.2104 0.1800 0.040 Uiso 1 1 calc R . . 
C5 C 0.7935(4) 0.7843(4) 0.1581(3) 0.0414(11) Uani 1 1 d . . . 
H5A H 0.7761 0.7751 0.2249 0.050 Uiso 1 1 calc R . . 
H5B H 0.7219 0.8440 0.1268 0.050 Uiso 1 1 calc R . . 
C45 C 1.6047(4) 0.0539(4) 0.2580(3) 0.0432(12) Uani 1 1 d . . . 
H45A H 1.6794 0.0222 0.2269 0.052 Uiso 1 1 calc R . . 
C44 C 1.5693(4) -0.0127(4) 0.3303(3) 0.0451(12) Uani 1 1 d . . . 
H44A H 1.6185 -0.0901 0.3481 0.054 Uiso 1 1 calc R . . 
S2 S 0.90920(10) 0.69995(9) 0.48225(7) 0.0309(3) Uani 1 1 d . . . 
F1 F 0.8678(2) 0.8835(2) 0.36043(16) 0.0450(7) Uani 1 1 d . . . 
F2 F 0.8033(3) 0.9198(2) 0.49570(19) 0.0603(8) Uani 1 1 d . . . 
O1 O 0.9405(3) 0.6852(3) 0.57865(18) 0.0385(7) Uani 1 1 d . . . 
F3 F 0.9961(3) 0.8789(3) 0.4678(2) 0.0611(8) Uani 1 1 d . . . 
C60 C 0.8944(4) 0.8518(4) 0.4501(3) 0.0339(10) Uani 1 1 d . . . 
O3 O 0.7884(3) 0.6928(3) 0.4635(2) 0.0520(9) Uani 1 1 d . . . 
O2 O 1.0058(4) 0.6427(3) 0.4250(2) 0.0694(12) Uani 1 1 d . . . 
C21 C 0.4823(4) 0.6387(4) 0.3844(3) 0.0309(10) Uani 1 1 d . . . 
C24 C 0.2918(5) 0.7977(4) 0.4681(4) 0.0478(12) Uani 1 1 d . . . 
H24 H 0.2380 0.8668 0.4878 0.057 Uiso 1 1 calc R A 1 
C25 C 0.397(2) 0.737(2) 0.5185(16) 0.047(5) Uani 0.64(4) 1 d P B 1 
H25A H 0.4050 0.7491 0.5813 0.057 Uiso 0.64(4) 1 calc PR B 1 
C26 C 0.4972(18) 0.654(2) 0.4770(14) 0.042(4) Uani 0.64(4) 1 d P B 1 
H26A H 0.5703 0.6117 0.5115 0.051 Uiso 0.64(4) 1 calc PR B 1 
C22 C 0.3608(13) 0.678(2) 0.3437(11) 0.051(4) Uani 0.64(4) 1 d P B 1 
H22A H 0.3452 0.6514 0.2873 0.062 Uiso 0.64(4) 1 calc PR B 1 
C23 C 0.2647(15) 0.755(2) 0.3856(12) 0.065(5) Uani 0.64(4) 1 d P B 1 
H23A H 0.1830 0.7790 0.3599 0.078 Uiso 0.64(4) 1 calc PR B 1 
C25A C 0.411(4) 0.765(3) 0.499(2) 0.023(5) Uani 0.36(4) 1 d PU B 2 
H25B H 0.4316 0.7967 0.5519 0.028 Uiso 0.36(4) 1 calc PR B 2 
C26A C 0.495(3) 0.694(2) 0.460(2) 0.026(5) Uani 0.36(4) 1 d PU B 2 
H26B H 0.5762 0.6757 0.4855 0.031 Uiso 0.36(4) 1 calc PR B 2 
C22A C 0.388(3) 0.718(2) 0.332(2) 0.052(7) Uani 0.36(4) 1 d P B 2 
H22B H 0.3843 0.7192 0.2670 0.063 Uiso 0.36(4) 1 calc PR B 2 
C23A C 0.298(3) 0.797(2) 0.3778(19) 0.047(6) Uani 0.36(4) 1 d P B 2 
H23B H 0.2359 0.8550 0.3410 0.056 Uiso 0.36(4) 1 calc PR B 2 
O4 O 1.3271(3) -0.3263(3) 0.1166(2) 0.0541(9) Uani 1 1 d D . . 
C70 C 1.3373(7) -0.1273(5) 0.0458(5) 0.095(2) Uiso 1 1 d D . . 
S3 S 1.3767(4) -0.2816(3) 0.0368(2) 0.0401(9) Uani 0.617(6) 1 d PD C 1 
O6 O 1.3172(8) -0.2769(8) -0.0501(5) 0.078(3) Uani 0.617(6) 1 d PD C 1 
O5 O 1.5076(5) -0.3217(7) 0.0346(4) 0.081(2) Uani 0.617(6) 1 d PD C 1 
F5 F 1.3965(8) -0.0736(7) -0.0149(6) 0.131(3) Uiso 0.617(6) 1 d PD C 1 
F4 F 1.2136(7) -0.0831(7) 0.0595(6) 0.116(3) Uiso 0.617(6) 1 d PD C 1 
F6 F 1.3928(7) -0.1112(7) 0.1236(5) 0.109(3) Uiso 0.617(6) 1 d PD C 1 
S3A S 1.3178(6) -0.2722(5) 0.0256(4) 0.0475(15) Uani 0.383(6) 1 d PD C 2 
O6A O 1.1956(8) -0.2522(13) -0.0085(7) 0.097(5) Uani 0.383(6) 1 d PD C 2 
O5A O 1.4110(12) -0.3173(9) -0.0390(9) 0.069(4) Uani 0.383(6) 1 d PD C 2 
F5A F 1.3101(9) -0.0635(8) -0.0366(6) 0.081(3) Uiso 0.383(6) 1 d PD C 2 
F4A F 1.2845(15) -0.0740(12) 0.1102(9) 0.146(5) Uiso 0.383(6) 1 d PD C 2 
F6A F 1.4613(15) -0.1576(14) 0.0697(11) 0.158(6) Uiso 0.383(6) 1 d P C 2 
 
loop_ 
 _atom_site_aniso_label 
 _atom_site_aniso_U_11 
 _atom_site_aniso_U_22 
 _atom_site_aniso_U_33 
 _atom_site_aniso_U_23 
 _atom_site_aniso_U_13 
 _atom_site_aniso_U_12 
S1 0.0480(7) 0.0237(6) 0.0208(5) -0.0020(4) 0.0003(5) -0.0121(5) 
C54 0.034(2) 0.033(2) 0.029(2) -0.0036(19) 0.0028(18) -0.0161(19) 
N1 0.0267(18) 0.0267(18) 0.0222(17) -0.0040(14) 0.0038(14) -0.0087(14) 
N2 0.0285(19) 0.035(2) 0.0248(18) -0.0055(15) 0.0020(15) -0.0131(15) 
C36 0.032(2) 0.032(2) 0.020(2) -0.0029(17) 0.0065(17) -0.0118(19) 
C2 0.030(2) 0.022(2) 0.023(2) -0.0004(16) 0.0028(17) -0.0045(17) 
C33 0.030(2) 0.034(2) 0.021(2) -0.0028(18) 0.0022(17) -0.0118(19) 
C11 0.033(2) 0.023(2) 0.021(2) -0.0021(17) 0.0019(17) -0.0111(17) 
C12 0.031(2) 0.030(2) 0.021(2) -0.0068(17) 0.0029(17) -0.0110(18) 
C1 0.036(2) 0.022(2) 0.022(2) -0.0047(17) 0.0040(17) -0.0076(18) 
C32 0.033(2) 0.032(2) 0.018(2) -0.0037(17) 0.0041(17) -0.0104(19) 
C3 0.039(2) 0.023(2) 0.028(2) -0.0053(17) 0.0043(18) -0.0124(18) 
C34 0.025(2) 0.031(2) 0.023(2) -0.0022(17) 0.0017(17) -0.0129(18) 
C6 0.033(2) 0.028(2) 0.039(3) 0.0003(19) -0.0032(19) -0.0051(19) 
C35 0.026(2) 0.029(2) 0.026(2) -0.0063(18) 0.0052(17) -0.0065(18) 
C16 0.036(2) 0.025(2) 0.035(2) -0.0046(19) 0.0106(19) -0.0077(19) 
C13 0.045(3) 0.033(2) 0.032(2) -0.0005(19) 0.008(2) -0.019(2) 
C15 0.043(3) 0.026(2) 0.046(3) -0.002(2) 0.006(2) -0.006(2) 
C41 0.029(2) 0.030(2) 0.027(2) -0.0054(18) 0.0000(17) -0.0103(18) 
C52 0.031(2) 0.043(3) 0.029(2) -0.009(2) -0.0019(18) -0.014(2) 
C53 0.030(2) 0.046(3) 0.033(2) -0.016(2) 0.0019(19) -0.013(2) 
C14 0.060(3) 0.024(2) 0.042(3) 0.000(2) 0.008(2) -0.015(2) 
C4 0.053(3) 0.021(2) 0.036(2) -0.0070(19) 0.001(2) -0.006(2) 
C55 0.029(2) 0.043(3) 0.030(2) -0.005(2) -0.0006(18) -0.010(2) 
C56 0.034(2) 0.042(3) 0.027(2) -0.007(2) -0.0020(19) -0.011(2) 
C42 0.029(2) 0.037(3) 0.035(2) -0.002(2) 0.0011(19) -0.0037(19) 
C43 0.039(3) 0.039(3) 0.039(3) 0.006(2) -0.003(2) -0.006(2) 
C46 0.027(2) 0.037(3) 0.034(2) -0.005(2) 0.0068(19) -0.0062(19) 
C5 0.041(3) 0.030(3) 0.047(3) -0.003(2) -0.002(2) 0.000(2) 
C45 0.030(3) 0.044(3) 0.049(3) -0.008(2) 0.002(2) 0.000(2) 
C44 0.040(3) 0.032(3) 0.055(3) 0.002(2) -0.009(2) -0.002(2) 
S2 0.0384(6) 0.0290(6) 0.0246(6) -0.0038(4) 0.0066(4) -0.0088(5) 
F1 0.0580(17) 0.0421(16) 0.0314(14) 0.0074(12) 0.0012(12) -0.0135(13) 
F2 0.082(2) 0.0338(16) 0.0596(19) -0.0105(14) 0.0331(16) -0.0077(14) 
O1 0.0408(18) 0.047(2) 0.0263(16) 0.0054(14) -0.0019(13) -0.0137(14) 
F3 0.0658(19) 0.068(2) 0.0621(19) 0.0100(16) -0.0091(15) -0.0440(16) 
C60 0.036(3) 0.036(3) 0.031(2) -0.003(2) 0.006(2) -0.014(2) 
O3 0.059(2) 0.058(2) 0.048(2) 0.0057(17) -0.0165(16) -0.0347(17) 
O2 0.096(3) 0.038(2) 0.058(2) -0.0036(18) 0.051(2) 0.0030(19) 
C21 0.022(2) 0.036(3) 0.037(2) -0.007(2) 0.0042(18) -0.0103(19) 
C24 0.048(3) 0.044(3) 0.050(3) -0.015(2) 0.010(2) -0.008(2) 
C25 0.040(7) 0.070(14) 0.046(9) -0.021(9) 0.022(7) -0.033(8) 
C26 0.038(6) 0.043(11) 0.038(8) -0.008(8) -0.007(5) 0.002(8) 
C22 0.033(6) 0.066(11) 0.049(7) -0.030(7) -0.002(5) 0.001(6) 
C23 0.030(7) 0.100(13) 0.066(8) -0.049(9) -0.005(6) -0.005(7) 
C25A 0.037(14) 0.029(11) 0.017(10) -0.006(7) 0.008(8) -0.029(8) 
C26A 0.026(8) 0.006(11) 0.037(13) 0.003(8) -0.022(8) 0.006(8) 
C22A 0.090(19) 0.030(11) 0.043(10) -0.006(8) -0.001(11) -0.027(10) 
C23A 0.028(13) 0.041(12) 0.062(12) -0.011(10) -0.006(9) 0.005(8) 
O4 0.062(2) 0.069(2) 0.0371(19) -0.0023(17) 0.0127(16) -0.0304(19) 
S3 0.054(2) 0.0422(14) 0.0264(14) -0.0086(10) 0.0034(16) -0.0161(16) 
O6 0.090(7) 0.129(7) 0.027(4) -0.025(4) -0.009(4) -0.043(5) 
O5 0.041(4) 0.141(7) 0.060(4) -0.024(4) 0.020(3) -0.022(4) 
S3A 0.055(4) 0.051(3) 0.036(3) -0.0080(18) 0.003(3) -0.015(3) 
O6A 0.058(7) 0.182(14) 0.052(7) -0.014(7) -0.003(6) -0.037(7) 
O5A 0.096(10) 0.059(7) 0.065(8) -0.027(6) 0.054(8) -0.034(7) 
 
_geom_special_details 
; 
 All esds (except the esd in the dihedral angle between two l.s. planes) 
 are estimated using the full covariance matrix.  The cell esds are taken 
 into account individually in the estimation of esds in distances, angles 
 and torsion angles; correlations between esds in cell parameters are only 
 used when they are defined by crystal symmetry.  An approximate (isotropic) 
 treatment of cell esds is used for estimating esds involving l.s. planes. 
; 
 
loop_ 
 _geom_bond_atom_site_label_1 
 _geom_bond_atom_site_label_2 
 _geom_bond_distance 
 _geom_bond_site_symmetry_2 
 _geom_bond_publ_flag 
S1 C11 1.824(4) . ? 
S1 C1 1.824(4) . ? 
C54 C55 1.395(6) . ? 
C54 C53 1.396(6) . ? 
C54 C21 1.470(6) . ? 
N1 C32 1.346(5) . ? 
N1 C36 1.350(5) . ? 
N1 C2 1.491(5) . ? 
N2 C56 1.338(5) . ? 
N2 C52 1.354(5) . ? 
N2 C12 1.496(5) . ? 
C36 C35 1.369(5) . ? 
C36 H36A 0.9500 . ? 
C2 C3 1.516(5) . ? 
C2 C1 1.531(5) . ? 
C2 H2A 1.0000 . ? 
C33 C32 1.359(5) . ? 
C33 C34 1.406(5) . ? 
C33 H33A 0.9500 . ? 
C11 C12 1.520(5) . ? 
C11 C16 1.533(5) . ? 
C11 H11A 1.0000 . ? 
C12 C13 1.521(5) . ? 
C12 H12A 1.0000 . ? 
C1 C6 1.514(5) . ? 
C1 H1A 1.0000 . ? 
C32 H32A 0.9500 . ? 
C3 C4 1.518(6) . ? 
C3 H3A 0.9900 . ? 
C3 H3B 0.9900 . ? 
C34 C35 1.395(5) . ? 
C34 C41 1.475(6) . ? 
C6 C5 1.518(6) . ? 
C6 H6A 0.9900 . ? 
C6 H6B 0.9900 . ? 
C35 H35A 0.9500 . ? 
C16 C15 1.503(6) . ? 
C16 H16A 0.9900 . ? 
C16 H16B 0.9900 . ? 
C13 C14 1.527(6) . ? 
C13 H13A 0.9900 . ? 
C13 H13B 0.9900 . ? 
C15 C14 1.511(6) . ? 
C15 H15A 0.9900 . ? 
C15 H15B 0.9900 . ? 
C41 C42 1.393(6) . ? 
C41 C46 1.397(5) . ? 
C52 C53 1.364(6) . ? 
C52 H52A 0.9500 . ? 
C53 H53A 0.9500 . ? 
C14 H14A 0.9900 . ? 
C14 H14B 0.9900 . ? 
C4 C5 1.526(6) . ? 
C4 H4A 0.9900 . ? 
C4 H4B 0.9900 . ? 
C55 C56 1.374(6) . ? 
C55 H55A 0.9500 . ? 
C56 H56A 0.9500 . ? 
C42 C43 1.369(6) . ? 
C42 H42A 0.9500 . ? 
C43 C44 1.377(6) . ? 
C43 H43A 0.9500 . ? 
C46 C45 1.380(6) . ? 
C46 H46A 0.9500 . ? 
C5 H5A 0.9900 . ? 
C5 H5B 0.9900 . ? 
C45 C44 1.382(6) . ? 
C45 H45A 0.9500 . ? 
C44 H44A 0.9500 . ? 
S2 O3 1.423(3) . ? 
S2 O2 1.423(3) . ? 
S2 O1 1.429(3) . ? 
S2 C60 1.809(4) . ? 
F1 C60 1.331(5) . ? 
F2 C60 1.335(5) . ? 
F3 C60 1.318(5) . ? 
C21 C26A 1.37(3) . ? 
C21 C22A 1.38(3) . ? 
C21 C26 1.40(2) . ? 
C21 C22 1.426(14) . ? 
C24 C23A 1.31(3) . ? 
C24 C25A 1.35(4) . ? 
C24 C25 1.38(3) . ? 
C24 C23 1.425(15) . ? 
C24 H24 0.9500 . ? 
C25 C26 1.45(3) . ? 
C25 H25A 0.9500 . ? 
C26 H26A 0.9500 . ? 
C22 C23 1.392(19) . ? 
C22 H22A 0.9500 . ? 
C23 H23A 0.9500 . ? 
C25A C26A 1.26(5) . ? 
C25A H25B 0.9500 . ? 
C26A H26B 0.9500 . ? 
C22A C23A 1.39(4) . ? 
C22A H22B 0.9500 . ? 
C23A H23B 0.9500 . ? 
O4 S3A 1.402(7) . ? 
O4 S3 1.407(4) . ? 
C70 F4A 1.243(9) . ? 
C70 F5 1.328(7) . ? 
C70 F5A 1.340(8) . ? 
C70 F6 1.359(6) . ? 
C70 F4 1.362(7) . ? 
C70 F6A 1.377(16) . ? 
C70 S3 1.811(6) . ? 
C70 S3A 1.886(7) . ? 
S3 O5 1.415(6) . ? 
S3 O6 1.425(6) . ? 
S3A O6A 1.415(8) . ? 
S3A O5A 1.428(8) . ? 
 
loop_ 
 _geom_angle_atom_site_label_1 
 _geom_angle_atom_site_label_2 
 _geom_angle_atom_site_label_3 
 _geom_angle 
 _geom_angle_site_symmetry_1 
 _geom_angle_site_symmetry_3 
 _geom_angle_publ_flag 
C11 S1 C1 106.91(18) . . ? 
C55 C54 C53 116.0(4) . . ? 
C55 C54 C21 122.7(4) . . ? 
C53 C54 C21 121.3(4) . . ? 
C32 N1 C36 119.8(3) . . ? 
C32 N1 C2 120.6(3) . . ? 
C36 N1 C2 119.3(3) . . ? 
C56 N2 C52 119.4(4) . . ? 
C56 N2 C12 120.6(3) . . ? 
C52 N2 C12 120.0(3) . . ? 
N1 C36 C35 121.1(4) . . ? 
N1 C36 H36A 119.4 . . ? 
C35 C36 H36A 119.4 . . ? 
N1 C2 C3 112.3(3) . . ? 
N1 C2 C1 110.4(3) . . ? 
C3 C2 C1 111.5(3) . . ? 
N1 C2 H2A 107.5 . . ? 
C3 C2 H2A 107.5 . . ? 
C1 C2 H2A 107.5 . . ? 
C32 C33 C34 120.3(4) . . ? 
C32 C33 H33A 119.8 . . ? 
C34 C33 H33A 119.8 . . ? 
C12 C11 C16 109.3(3) . . ? 
C12 C11 S1 111.6(3) . . ? 
C16 C11 S1 107.9(3) . . ? 
C12 C11 H11A 109.3 . . ? 
C16 C11 H11A 109.3 . . ? 
S1 C11 H11A 109.3 . . ? 
N2 C12 C11 111.4(3) . . ? 
N2 C12 C13 109.7(3) . . ? 
C11 C12 C13 112.9(3) . . ? 
N2 C12 H12A 107.5 . . ? 
C11 C12 H12A 107.5 . . ? 
C13 C12 H12A 107.5 . . ? 
C6 C1 C2 109.8(3) . . ? 
C6 C1 S1 108.6(3) . . ? 
C2 C1 S1 111.8(3) . . ? 
C6 C1 H1A 108.9 . . ? 
C2 C1 H1A 108.9 . . ? 
S1 C1 H1A 108.9 . . ? 
N1 C32 C33 121.1(4) . . ? 
N1 C32 H32A 119.4 . . ? 
C33 C32 H32A 119.4 . . ? 
C2 C3 C4 109.3(3) . . ? 
C2 C3 H3A 109.8 . . ? 
C4 C3 H3A 109.8 . . ? 
C2 C3 H3B 109.8 . . ? 
C4 C3 H3B 109.8 . . ? 
H3A C3 H3B 108.3 . . ? 
C35 C34 C33 117.0(4) . . ? 
C35 C34 C41 121.8(4) . . ? 
C33 C34 C41 121.1(3) . . ? 
C1 C6 C5 111.8(3) . . ? 
C1 C6 H6A 109.2 . . ? 
C5 C6 H6A 109.2 . . ? 
C1 C6 H6B 109.2 . . ? 
C5 C6 H6B 109.2 . . ? 
H6A C6 H6B 107.9 . . ? 
C36 C35 C34 120.1(4) . . ? 
C36 C35 H35A 119.9 . . ? 
C34 C35 H35A 119.9 . . ? 
C15 C16 C11 111.7(3) . . ? 
C15 C16 H16A 109.3 . . ? 
C11 C16 H16A 109.3 . . ? 
C15 C16 H16B 109.3 . . ? 
C11 C16 H16B 109.3 . . ? 
H16A C16 H16B 107.9 . . ? 
C12 C13 C14 110.3(3) . . ? 
C12 C13 H13A 109.6 . . ? 
C14 C13 H13A 109.6 . . ? 
C12 C13 H13B 109.6 . . ? 
C14 C13 H13B 109.6 . . ? 
H13A C13 H13B 108.1 . . ? 
C16 C15 C14 110.6(4) . . ? 
C16 C15 H15A 109.5 . . ? 
C14 C15 H15A 109.5 . . ? 
C16 C15 H15B 109.5 . . ? 
C14 C15 H15B 109.5 . . ? 
H15A C15 H15B 108.1 . . ? 
C42 C41 C46 118.9(4) . . ? 
C42 C41 C34 119.5(4) . . ? 
C46 C41 C34 121.4(4) . . ? 
N2 C52 C53 121.4(4) . . ? 
N2 C52 H52A 119.3 . . ? 
C53 C52 H52A 119.3 . . ? 
C52 C53 C54 120.9(4) . . ? 
C52 C53 H53A 119.6 . . ? 
C54 C53 H53A 119.6 . . ? 
C15 C14 C13 110.2(4) . . ? 
C15 C14 H14A 109.6 . . ? 
C13 C14 H14A 109.6 . . ? 
C15 C14 H14B 109.6 . . ? 
C13 C14 H14B 109.6 . . ? 
H14A C14 H14B 108.1 . . ? 
C3 C4 C5 110.8(4) . . ? 
C3 C4 H4A 109.5 . . ? 
C5 C4 H4A 109.5 . . ? 
C3 C4 H4B 109.5 . . ? 
C5 C4 H4B 109.5 . . ? 
H4A C4 H4B 108.1 . . ? 
C56 C55 C54 121.2(4) . . ? 
C56 C55 H55A 119.4 . . ? 
C54 C55 H55A 119.4 . . ? 
N2 C56 C55 121.0(4) . . ? 
N2 C56 H56A 119.5 . . ? 
C55 C56 H56A 119.5 . . ? 
C43 C42 C41 120.5(4) . . ? 
C43 C42 H42A 119.7 . . ? 
C41 C42 H42A 119.7 . . ? 
C42 C43 C44 120.7(4) . . ? 
C42 C43 H43A 119.6 . . ? 
C44 C43 H43A 119.6 . . ? 
C45 C46 C41 119.6(4) . . ? 
C45 C46 H46A 120.2 . . ? 
C41 C46 H46A 120.2 . . ? 
C6 C5 C4 110.5(3) . . ? 
C6 C5 H5A 109.6 . . ? 
C4 C5 H5A 109.6 . . ? 
C6 C5 H5B 109.6 . . ? 
C4 C5 H5B 109.6 . . ? 
H5A C5 H5B 108.1 . . ? 
C46 C45 C44 120.9(4) . . ? 
C46 C45 H45A 119.6 . . ? 
C44 C45 H45A 119.6 . . ? 
C43 C44 C45 119.3(4) . . ? 
C43 C44 H44A 120.4 . . ? 
C45 C44 H44A 120.4 . . ? 
O3 S2 O2 116.8(2) . . ? 
O3 S2 O1 113.67(18) . . ? 
O2 S2 O1 115.1(2) . . ? 
O3 S2 C60 103.0(2) . . ? 
O2 S2 C60 103.1(2) . . ? 
O1 S2 C60 102.53(19) . . ? 
F3 C60 F1 106.9(3) . . ? 
F3 C60 F2 106.8(4) . . ? 
F1 C60 F2 106.4(3) . . ? 
F3 C60 S2 112.8(3) . . ? 
F1 C60 S2 112.2(3) . . ? 
F2 C60 S2 111.4(3) . . ? 
C26A C21 C22A 104.1(17) . . ? 
C26A C21 C26 21.1(10) . . ? 
C22A C21 C26 118.6(15) . . ? 
C26A C21 C22 113.4(15) . . ? 
C22A C21 C22 26.8(8) . . ? 
C26 C21 C22 118.6(10) . . ? 
C26A C21 C54 127.0(13) . . ? 
C22A C21 C54 121.3(13) . . ? 
C26 C21 C54 119.1(9) . . ? 
C22 C21 C54 119.5(7) . . ? 
C23A C24 C25A 106(2) . . ? 
C23A C24 C25 116.6(16) . . ? 
C25A C24 C25 20.1(10) . . ? 
C23A C24 C23 29.8(9) . . ? 
C25A C24 C23 118.4(15) . . ? 
C25 C24 C23 118.7(12) . . ? 
C23A C24 H24 114.3 . . ? 
C25A C24 H24 117.1 . . ? 
C25 C24 H24 120.6 . . ? 
C23 C24 H24 120.6 . . ? 
C24 C25 C26 120.7(17) . . ? 
C24 C25 H25A 119.6 . . ? 
C26 C25 H25A 119.6 . . ? 
C21 C26 C25 117.7(16) . . ? 
C21 C26 H26A 121.1 . . ? 
C25 C26 H26A 121.1 . . ? 
C23 C22 C21 120.8(12) . . ? 
C23 C22 H22A 119.6 . . ? 
C21 C22 H22A 119.6 . . ? 
C22 C23 C24 118.4(11) . . ? 
C22 C23 H23A 120.8 . . ? 
C24 C23 H23A 120.8 . . ? 
C26A C25A C24 121(3) . . ? 
C26A C25A H25B 119.5 . . ? 
C24 C25A H25B 119.5 . . ? 
C25A C26A C21 128(3) . . ? 
C25A C26A H26B 116.2 . . ? 
C21 C26A H26B 116.2 . . ? 
C21 C22A C23A 118(2) . . ? 
C21 C22A H22B 120.8 . . ? 
C23A C22A H22B 120.8 . . ? 
C24 C23A C22A 125(2) . . ? 
C24 C23A H23B 117.7 . . ? 
C22A C23A H23B 117.7 . . ? 
S3A O4 S3 27.14(19) . . ? 
F4A C70 F5 118.0(9) . . ? 
F4A C70 F5A 112.4(9) . . ? 
F5 C70 F5A 43.9(5) . . ? 
F4A C70 F6 53.9(8) . . ? 
F5 C70 F6 97.4(7) . . ? 
F5A C70 F6 131.9(7) . . ? 
F4A C70 F4 51.2(8) . . ? 
F5 C70 F4 121.4(7) . . ? 
F5A C70 F4 83.5(7) . . ? 
F6 C70 F4 104.8(6) . . ? 
F4A C70 F6A 104.2(11) . . ? 
F5 C70 F6A 69.8(8) . . ? 
F5A C70 F6A 113.1(9) . . ? 
F6 C70 F6A 50.4(7) . . ? 
F4 C70 F6A 155.2(9) . . ? 
F4A C70 S3 127.8(9) . . ? 
F5 C70 S3 112.6(6) . . ? 
F5A C70 S3 112.6(6) . . ? 
F6 C70 S3 108.5(5) . . ? 
F4 C70 S3 110.4(5) . . ? 
F6A C70 S3 81.1(8) . . ? 
F4A C70 S3A 121.1(9) . . ? 
F5 C70 S3A 120.5(6) . . ? 
F5A C70 S3A 104.3(6) . . ? 
F6 C70 S3A 122.4(5) . . ? 
F4 C70 S3A 91.3(5) . . ? 
F6A C70 S3A 101.5(8) . . ? 
S3 C70 S3A 20.42(15) . . ? 
O4 S3 O5 113.5(4) . . ? 
O4 S3 O6 118.1(5) . . ? 
O5 S3 O6 113.8(5) . . ? 
O4 S3 C70 104.2(3) . . ? 
O5 S3 C70 106.1(4) . . ? 
O6 S3 C70 98.6(5) . . ? 
O4 S3A O6A 108.8(6) . . ? 
O4 S3A O5A 119.6(8) . . ? 
O6A S3A O5A 113.6(10) . . ? 
O4 S3A C70 100.8(4) . . ? 
O6A S3A C70 107.7(7) . . ? 
O5A S3A C70 104.9(6) . . ? 
 
_diffrn_measured_fraction_theta_max     .953 
_diffrn_reflns_theta_full              25.03 
_diffrn_measured_fraction_theta_full    .953 
_refine_diff_density_max     .899 
_refine_diff_density_min    -.857 
_refine_diff_density_rms     .074 

 
data_8Ph 
 
_audit_creation_method            SHELXL-97 
_chemical_name_systematic 
; 
 ? 
; 
_chemical_name_common             ? 
_chemical_melting_point           ? 
_chemical_formula_moiety          ? 
_chemical_formula_sum 
 'C31 H32 F6 N4 O6 S3' 
_chemical_formula_weight          766.79 
 
loop_ 
 _atom_type_symbol 
 _atom_type_description 
 _atom_type_scat_dispersion_real 
 _atom_type_scat_dispersion_imag 
 _atom_type_scat_source 
 'C'  'C'    .0033    .0016 
 'International Tables Vol C Tables 4.2.6.8 and 6.1.1.4' 
 'H'  'H'    .0000    .0000 
 'International Tables Vol C Tables 4.2.6.8 and 6.1.1.4' 
 'F'  'F'    .0171    .0103 
 'International Tables Vol C Tables 4.2.6.8 and 6.1.1.4' 
 'N'  'N'    .0061    .0033 
 'International Tables Vol C Tables 4.2.6.8 and 6.1.1.4' 
 'O'  'O'    .0106    .0060 
 'International Tables Vol C Tables 4.2.6.8 and 6.1.1.4' 
 'S'  'S'    .1246    .1234 
 'International Tables Vol C Tables 4.2.6.8 and 6.1.1.4' 
 
_symmetry_cell_setting            triclinic 
_symmetry_space_group_name_H-M    P-1 
 
loop_ 
 _symmetry_equiv_pos_as_xyz 
 'x, y, z' 
 '-x, -y, -z' 
 
_cell_length_a                    8.3050(5) 
_cell_length_b                    15.0203(10) 
_cell_length_c                    15.1251(10) 
_cell_angle_alpha                 107.243(4) 
_cell_angle_beta                  95.421(4) 
_cell_angle_gamma                 98.949(3) 
_cell_volume                      1760.2(2) 
_cell_formula_units_Z             2 
_cell_measurement_temperature     150(2) 
_cell_measurement_reflns_used     18466 
_cell_measurement_theta_min       1.00 
_cell_measurement_theta_max       24.79  
 
_exptl_crystal_description        'block' 
_exptl_crystal_colour             'colorless' 
_exptl_crystal_size_max           0.17 
_exptl_crystal_size_mid           0.16 
_exptl_crystal_size_min           0.10 
_exptl_crystal_density_meas       ? 
_exptl_crystal_density_diffrn     1.447 
_exptl_crystal_density_method     'not measured' 
_exptl_crystal_F_000              792 
_exptl_absorpt_coefficient_mu     0.290 
_exptl_absorpt_correction_type    'multi-scan' 
_exptl_absorpt_correction_T_min   0.9523 
_exptl_absorpt_correction_T_max   0.9716 
_exptl_absorpt_process_details    'SAINT' 
 
_exptl_special_details 
; 
 ? 
; 
 
_diffrn_ambient_temperature       150(2) 
_diffrn_radiation_wavelength      0.71073 
_diffrn_radiation_type            MoK\a 
_diffrn_radiation_source          'fine-focus sealed tube' 
_diffrn_radiation_monochromator   graphite 
_diffrn_measurement_device_type   'Bruker APEX 11 CCD' 
_diffrn_measurement_method        '\f scans, and \w scans' 
_diffrn_detector_area_resol_mean  ? 
_diffrn_standards_number          ? 
_diffrn_standards_interval_count  ? 
_diffrn_standards_interval_time   ? 
_diffrn_standards_decay_%         ? 
_diffrn_reflns_number             9198 
_diffrn_reflns_av_R_equivalents   0.0176 
_diffrn_reflns_av_sigmaI/netI     0.0310 
_diffrn_reflns_limit_h_min        -8 
_diffrn_reflns_limit_h_max        9 
_diffrn_reflns_limit_k_min        -17 
_diffrn_reflns_limit_k_max        17 
_diffrn_reflns_limit_l_min        -17 
_diffrn_reflns_limit_l_max        10 
_diffrn_reflns_theta_min          1.43 
_diffrn_reflns_theta_max          24.72 
_reflns_number_total              5645 
_reflns_number_gt                 4575 
_reflns_threshold_expression      >2sigma(I) 
 
_computing_data_collection        'APEX2' 
_computing_cell_refinement        'SAINT' 
_computing_data_reduction         'SAINT' 
_computing_structure_solution     'SHELXS-97 (Sheldrick, 1990)' 
_computing_structure_refinement   'SHELXL-97 (Sheldrick, 1997)' 
_computing_molecular_graphics     'SHELXTL/PC (Sheldrick, 2001)' 
_computing_publication_material   'SHELXTL/PC'  
 
_refine_special_details 
; 
 Refinement of F^2^ against ALL reflections.  The weighted R-factor wR and 
 goodness of fit S are based on F^2^, conventional R-factors R are based 
 on F, with F set to zero for negative F^2^. The threshold expression of 
 F^2^ > 2sigma(F^2^) is used only for calculating R-factors(gt) etc. and is 
 not relevant to the choice of reflections for refinement.  R-factors based 
 on F^2^ are statistically about twice as large as those based on F, and R- 
 factors based on ALL data will be even larger. 
; 
 
_refine_ls_structure_factor_coef  Fsqd  
_refine_ls_matrix_type            full 
_refine_ls_weighting_scheme       calc  
_refine_ls_weighting_details 
 'calc w=1/[\s^2^(Fo^2^)+(0.1348P)^2^+2.7080P] where P=(Fo^2^+2Fc^2^)/3' 
_atom_sites_solution_primary      direct 
_atom_sites_solution_secondary    difmap 
_atom_sites_solution_hydrogens    geom 
_refine_ls_hydrogen_treatment     constr 
_refine_ls_extinction_method      none 
_refine_ls_extinction_coef        ? 
_refine_ls_number_reflns          5645 
_refine_ls_number_parameters      495 
_refine_ls_number_restraints      54 
_refine_ls_R_factor_all           0.0889 
_refine_ls_R_factor_gt            0.0759 
_refine_ls_wR_factor_ref          0.2322 
_refine_ls_wR_factor_gt           0.2182 
_refine_ls_goodness_of_fit_ref    1.041 
_refine_ls_restrained_S_all       1.040 
_refine_ls_shift/su_max           0.032 
_refine_ls_shift/su_mean          0.002 
 
loop_ 
 _atom_site_label 
 _atom_site_type_symbol 
 _atom_site_fract_x 
 _atom_site_fract_y 
 _atom_site_fract_z 
 _atom_site_U_iso_or_equiv 
 _atom_site_adp_type 
 _atom_site_occupancy 
 _atom_site_symmetry_multiplicity 
 _atom_site_calc_flag 
 _atom_site_refinement_flags 
 _atom_site_disorder_assembly 
 _atom_site_disorder_group 
S1 S 0.31859(14) 0.54685(8) 0.31943(9) 0.0537(3) Uani 1 1 d . . . 
N1 N 0.3930(4) 0.4866(2) 0.2263(2) 0.0450(8) Uani 1 1 d . . . 
N2 N 0.5528(4) 0.3684(2) 0.1688(2) 0.0362(7) Uani 1 1 d . . . 
N4 N 0.6274(5) 0.4841(3) 0.3215(3) 0.0560(10) Uani 1 1 d . . . 
N38 N 0.4379(4) 0.6658(3) 0.3545(2) 0.0479(9) Uani 1 1 d . . . 
C1 C 0.8721(7) 1.1361(4) 0.5296(4) 0.0696(15) Uani 1 1 d . . . 
H1A H 0.9306 1.2000 0.5529 0.084 Uiso 1 1 calc R . . 
C2 C 0.7789(7) 1.1026(4) 0.4422(4) 0.0695(14) Uani 1 1 d . . . 
H2A H 0.7742 1.1435 0.4050 0.083 Uiso 1 1 calc R . . 
C3 C 0.6923(6) 1.0104(4) 0.4081(3) 0.0612(12) Uani 1 1 d . . . 
H3A H 0.6281 0.9882 0.3477 0.073 Uiso 1 1 calc R . . 
C4 C 0.6984(5) 0.9501(3) 0.4615(3) 0.0456(10) Uani 1 1 d . . . 
C5 C 0.6089(5) 0.8507(3) 0.4249(3) 0.0464(10) Uani 1 1 d . . . 
C6 C 0.4640(5) 0.8237(3) 0.3580(3) 0.0546(11) Uani 1 1 d . . . 
H6A H 0.4247 0.8705 0.3358 0.066 Uiso 1 1 calc R . . 
C7 C 0.3806(5) 0.7330(3) 0.3251(3) 0.0558(11) Uani 1 1 d . . . 
H7A H 0.2822 0.7166 0.2815 0.067 Uiso 1 1 calc R . . 
C9 C 0.5326(5) 0.4522(3) 0.2449(3) 0.0416(9) Uani 1 1 d . . . 
C10 C 0.4699(5) 0.2057(3) 0.0859(3) 0.0424(9) Uani 1 1 d . . . 
H10A H 0.4000 0.1464 0.0773 0.051 Uiso 1 1 calc R . . 
C11 C 0.5884(5) 0.2116(3) 0.0269(3) 0.0388(9) Uani 1 1 d . . . 
C12 C 0.6004(5) 0.1284(3) -0.0522(3) 0.0418(9) Uani 1 1 d . . . 
C13 C 0.4635(6) 0.0572(3) -0.0953(3) 0.0512(10) Uani 1 1 d . . . 
H13A H 0.3614 0.0611 -0.0724 0.061 Uiso 1 1 calc R . . 
C14 C 0.4739(7) -0.0192(3) -0.1710(3) 0.0587(12) Uani 1 1 d . . . 
H14A H 0.3787 -0.0669 -0.1998 0.070 Uiso 1 1 calc R . . 
C15 C 0.6186(7) -0.0269(3) -0.2050(4) 0.0653(13) Uani 1 1 d . . . 
H15A H 0.6249 -0.0798 -0.2569 0.078 Uiso 1 1 calc R . . 
C16 C 0.8805(7) 1.0775(4) 0.5828(4) 0.0686(14) Uani 1 1 d . . . 
H16A H 0.9455 1.1007 0.6430 0.082 Uiso 1 1 calc R . . 
C17 C 0.7952(6) 0.9849(4) 0.5499(3) 0.0577(12) Uani 1 1 d . . . 
H17A H 0.8022 0.9445 0.5875 0.069 Uiso 1 1 calc R . . 
C18 C 0.6618(6) 0.7794(3) 0.4531(3) 0.0547(11) Uani 1 1 d . . . 
H18A H 0.7595 0.7939 0.4970 0.066 Uiso 1 1 calc R . . 
C19 C 0.5734(6) 0.6862(3) 0.4179(3) 0.0550(11) Uani 1 1 d . . . 
H19A H 0.6089 0.6376 0.4387 0.066 Uiso 1 1 calc R . . 
C20 C 0.3121(5) 0.4724(3) 0.1277(3) 0.0448(10) Uani 1 1 d . . . 
H20A H 0.3477 0.4165 0.0850 0.054 Uiso 1 1 calc R . . 
C21 C 0.1276(5) 0.4487(4) 0.1198(4) 0.0699(15) Uani 1 1 d . . . 
H21A H 0.0777 0.4393 0.0556 0.105 Uiso 1 1 calc R . . 
H21B H 0.0890 0.5009 0.1631 0.105 Uiso 1 1 calc R . . 
H21C H 0.0958 0.3903 0.1357 0.105 Uiso 1 1 calc R . . 
C22 C 0.3706(6) 0.5566(3) 0.0973(4) 0.0586(12) Uani 1 1 d . . . 
H22A H 0.4912 0.5683 0.1031 0.088 Uiso 1 1 calc R . . 
H22B H 0.3357 0.6125 0.1370 0.088 Uiso 1 1 calc R . . 
H22C H 0.3233 0.5440 0.0319 0.088 Uiso 1 1 calc R . . 
C23 C 0.7630(6) 0.4393(4) 0.3466(3) 0.0616(13) Uani 1 1 d . . . 
H23A H 0.7838 0.3909 0.2894 0.074 Uiso 1 1 calc R . . 
C24 C 0.9134(7) 0.5158(5) 0.3853(4) 0.0789(16) Uani 1 1 d . . . 
H24A H 0.9428 0.5442 0.3370 0.118 Uiso 1 1 calc R . . 
H24B H 1.0049 0.4885 0.4048 0.118 Uiso 1 1 calc R . . 
H24C H 0.8908 0.5648 0.4393 0.118 Uiso 1 1 calc R . . 
C25 C 0.7118(7) 0.3911(4) 0.4177(4) 0.0744(15) Uani 1 1 d . . . 
H25A H 0.6144 0.3409 0.3892 0.112 Uiso 1 1 calc R . . 
H25B H 0.6855 0.4381 0.4722 0.112 Uiso 1 1 calc R . . 
H25C H 0.8023 0.3633 0.4377 0.112 Uiso 1 1 calc R . . 
C26 C 0.6921(5) 0.2995(3) 0.0446(3) 0.0394(9) Uani 1 1 d . . . 
H26A H 0.7761 0.3058 0.0071 0.047 Uiso 1 1 calc R . . 
C27 C 0.6733(5) 0.3765(3) 0.1154(3) 0.0392(9) Uani 1 1 d . . . 
H27A H 0.7448 0.4360 0.1274 0.047 Uiso 1 1 calc R . . 
C28 C 0.7564(7) 0.0429(4) -0.1631(5) 0.0782(17) Uani 1 1 d . . . 
H28A H 0.8580 0.0378 -0.1865 0.094 Uiso 1 1 calc R . . 
C29 C 0.7479(6) 0.1201(3) -0.0877(4) 0.0635(13) Uani 1 1 d . . . 
H29A H 0.8434 0.1679 -0.0598 0.076 Uiso 1 1 calc R . . 
C99A C 0.4537(5) 0.2841(3) 0.1555(3) 0.0440(9) Uani 1 1 d . . . 
H99A H 0.3723 0.2793 0.1948 0.053 Uiso 1 1 calc R . . 
S5 S 0.13964(15) 0.26893(9) 0.32576(9) 0.0575(4) Uani 1 1 d . . . 
F13 F -0.0365(4) 0.0988(2) 0.2435(3) 0.0965(12) Uani 1 1 d . . . 
F14 F -0.1481(4) 0.2118(3) 0.2203(4) 0.1130(14) Uani 1 1 d . . . 
F15 F 0.0567(6) 0.1674(3) 0.1490(3) 0.1136(14) Uani 1 1 d . . . 
O3 O 0.1605(6) 0.3495(3) 0.2957(3) 0.0903(13) Uani 1 1 d . . . 
O4 O 0.2834(4) 0.2270(3) 0.3243(3) 0.0789(11) Uani 1 1 d . . . 
O5 O 0.0578(5) 0.2754(3) 0.4060(3) 0.0744(10) Uani 1 1 d . . . 
C60 C 0.0024(7) 0.1860(4) 0.2336(4) 0.0699(14) Uani 1 1 d . . . 
C58 C 0.7949(6) 0.7640(3) 0.1536(3) 0.0564(11) Uiso 1 1 d D . . 
S3 S 0.9045(4) 0.6786(2) 0.1791(2) 0.0523(10) Uani 0.661(13) 1 d PD A 1 
O25 O 0.8039(10) 0.5893(4) 0.1263(10) 0.056(4) Uani 0.661(13) 1 d PD A 1 
O26 O 1.0572(7) 0.6990(5) 0.1519(8) 0.083(3) Uani 0.661(13) 1 d PD A 1 
O27 O 0.9035(19) 0.7038(6) 0.2783(5) 0.139(5) Uani 0.661(13) 1 d PDU A 1 
F3 F 0.7901(13) 0.7534(6) 0.0624(4) 0.094(3) Uani 0.661(13) 1 d PD A 1 
F6 F 0.6477(9) 0.7552(5) 0.1703(11) 0.110(4) Uani 0.661(13) 1 d PDU A 1 
F2 F 0.8704(15) 0.8528(5) 0.1985(10) 0.082(3) Uani 0.661(13) 1 d PD A 1 
S3A S 0.9255(9) 0.6791(5) 0.1588(9) 0.124(5) Uani 0.339(13) 1 d PGDU A 2 
O26A O 0.8137(16) 0.5905(6) 0.1398(12) 0.070(11) Uani 0.339(13) 1 d PGD A 2 
O27A O 1.020(2) 0.6846(10) 0.0858(16) 0.149(12) Uani 0.339(13) 1 d PGDU A 2 
O25A O 1.015(2) 0.7172(10) 0.2519(13) 0.179(17) Uani 0.339(13) 1 d PGDU A 2 
F3A F 0.694(2) 0.7380(9) 0.0744(12) 0.138(11) Uani 0.339(13) 1 d PGDU A 2 
F6A F 0.6888(19) 0.7662(12) 0.2197(15) 0.199(17) Uani 0.339(13) 1 d PGDU A 2 
F2A F 0.8722(18) 0.8500(5) 0.1741(13) 0.067(6) Uani 0.339(13) 1 d PGD A 2 
 
loop_ 
 _atom_site_aniso_label 
 _atom_site_aniso_U_11 
 _atom_site_aniso_U_22 
 _atom_site_aniso_U_33 
 _atom_site_aniso_U_23 
 _atom_site_aniso_U_13 
 _atom_site_aniso_U_12 
S1 0.0451(6) 0.0527(7) 0.0619(7) 0.0142(5) 0.0147(5) 0.0097(5) 
N1 0.0359(17) 0.0454(19) 0.051(2) 0.0109(15) 0.0009(15) 0.0117(14) 
N2 0.0343(16) 0.0386(17) 0.0402(17) 0.0170(14) 0.0081(13) 0.0106(13) 
N4 0.059(2) 0.062(2) 0.046(2) 0.0123(18) -0.0005(18) 0.0246(19) 
N38 0.0397(18) 0.057(2) 0.050(2) 0.0152(16) 0.0094(16) 0.0185(16) 
C1 0.065(3) 0.053(3) 0.081(4) 0.004(3) 0.030(3) 0.001(2) 
C2 0.079(4) 0.063(3) 0.076(4) 0.031(3) 0.033(3) 0.010(3) 
C3 0.069(3) 0.062(3) 0.053(3) 0.019(2) 0.012(2) 0.011(2) 
C4 0.042(2) 0.053(2) 0.041(2) 0.0114(18) 0.0132(18) 0.0094(18) 
C5 0.041(2) 0.054(2) 0.046(2) 0.0133(19) 0.0173(18) 0.0145(18) 
C6 0.049(2) 0.050(3) 0.063(3) 0.013(2) 0.005(2) 0.014(2) 
C7 0.041(2) 0.059(3) 0.063(3) 0.012(2) 0.002(2) 0.017(2) 
C9 0.038(2) 0.043(2) 0.045(2) 0.0144(17) 0.0114(18) 0.0077(17) 
C10 0.039(2) 0.039(2) 0.054(2) 0.0220(18) 0.0104(18) 0.0036(16) 
C11 0.037(2) 0.038(2) 0.048(2) 0.0218(17) 0.0065(17) 0.0103(16) 
C12 0.043(2) 0.036(2) 0.052(2) 0.0193(17) 0.0121(18) 0.0102(16) 
C13 0.054(3) 0.044(2) 0.058(3) 0.019(2) 0.010(2) 0.0092(19) 
C14 0.069(3) 0.041(2) 0.062(3) 0.015(2) 0.006(2) 0.003(2) 
C15 0.092(4) 0.040(2) 0.065(3) 0.013(2) 0.025(3) 0.015(2) 
C16 0.063(3) 0.069(3) 0.058(3) -0.002(3) 0.013(2) 0.008(3) 
C17 0.055(3) 0.064(3) 0.051(3) 0.010(2) 0.012(2) 0.013(2) 
C18 0.048(2) 0.057(3) 0.056(3) 0.017(2) 0.002(2) 0.008(2) 
C19 0.055(3) 0.062(3) 0.050(2) 0.018(2) 0.003(2) 0.020(2) 
C20 0.035(2) 0.043(2) 0.053(2) 0.0139(18) -0.0049(18) 0.0075(17) 
C21 0.038(2) 0.085(4) 0.087(4) 0.043(3) -0.009(2) -0.007(2) 
C22 0.060(3) 0.056(3) 0.061(3) 0.024(2) 0.010(2) 0.005(2) 
C23 0.059(3) 0.077(3) 0.051(3) 0.018(2) -0.003(2) 0.030(3) 
C24 0.060(3) 0.104(5) 0.081(4) 0.042(3) 0.001(3) 0.020(3) 
C25 0.061(3) 0.091(4) 0.085(4) 0.047(3) -0.001(3) 0.023(3) 
C26 0.0336(19) 0.042(2) 0.047(2) 0.0189(17) 0.0116(17) 0.0069(16) 
C27 0.0351(19) 0.035(2) 0.049(2) 0.0178(17) 0.0058(17) 0.0057(15) 
C28 0.079(4) 0.055(3) 0.100(4) 0.011(3) 0.048(3) 0.016(3) 
C29 0.054(3) 0.042(2) 0.090(4) 0.010(2) 0.030(3) 0.004(2) 
C99A 0.037(2) 0.049(2) 0.053(2) 0.0254(19) 0.0144(18) 0.0087(17) 
S5 0.0575(7) 0.0561(7) 0.0639(8) 0.0251(6) 0.0202(6) 0.0063(5) 
F13 0.074(2) 0.0524(18) 0.162(4) 0.034(2) 0.025(2) 0.0054(15) 
F14 0.072(2) 0.086(2) 0.171(4) 0.042(3) -0.024(2) 0.0110(19) 
F15 0.122(3) 0.119(3) 0.074(2) 0.017(2) -0.012(2) -0.006(3) 
O3 0.113(3) 0.066(2) 0.094(3) 0.040(2) 0.025(3) -0.011(2) 
O4 0.056(2) 0.096(3) 0.075(2) 0.010(2) 0.0186(18) 0.0152(19) 
O5 0.073(2) 0.087(3) 0.083(3) 0.041(2) 0.039(2) 0.029(2) 
C60 0.069(3) 0.072(3) 0.089(4) 0.046(3) 0.033(3) 0.024(3) 
S3 0.0496(16) 0.0356(14) 0.0634(15) 0.0228(10) -0.0294(11) -0.0076(10) 
O25 0.041(6) 0.033(6) 0.082(6) 0.008(4) -0.004(4) 0.001(4) 
O26 0.028(3) 0.060(4) 0.175(9) 0.063(6) 0.000(4) 0.006(3) 
O27 0.283(15) 0.064(4) 0.048(4) 0.024(3) -0.024(6) -0.015(7) 
F3 0.122(7) 0.091(4) 0.069(4) 0.028(3) -0.031(4) 0.042(5) 
F6 0.066(4) 0.058(4) 0.228(12) 0.047(5) 0.082(5) 0.032(3) 
F2 0.103(7) 0.036(4) 0.092(5) 0.012(3) -0.016(4) 0.001(4) 
S3A 0.057(4) 0.028(3) 0.252(13) -0.013(4) 0.046(6) 0.009(2) 
O26A 0.069(17) 0.043(15) 0.083(15) 0.018(10) -0.016(11) -0.008(11) 
O27A 0.139(18) 0.084(10) 0.22(3) 0.008(14) 0.154(19) 0.023(11) 
O25A 0.17(2) 0.047(9) 0.23(3) -0.025(13) -0.17(2) 0.015(11) 
F3A 0.112(14) 0.073(8) 0.186(19) 0.006(9) -0.107(14) 0.035(10) 
F6A 0.27(3) 0.109(13) 0.22(2) -0.001(13) 0.22(2) 0.026(15) 
F2A 0.054(8) 0.027(7) 0.116(15) 0.026(7) -0.009(7) 0.003(5) 
 
_geom_special_details 
; 
 All esds (except the esd in the dihedral angle between two l.s. planes) 
 are estimated using the full covariance matrix.  The cell esds are taken 
 into account individually in the estimation of esds in distances, angles 
 and torsion angles; correlations between esds in cell parameters are only 
 used when they are defined by crystal symmetry.  An approximate (isotropic) 
 treatment of cell esds is used for estimating esds involving l.s. planes. 
; 
 
loop_ 
 _geom_bond_atom_site_label_1 
 _geom_bond_atom_site_label_2 
 _geom_bond_distance 
 _geom_bond_site_symmetry_2 
 _geom_bond_publ_flag 
S1 N1 1.664(4) . ? 
S1 N38 1.801(4) . ? 
N1 C9 1.379(5) . ? 
N1 C20 1.517(5) . ? 
N2 C99A 1.348(5) . ? 
N2 C27 1.357(5) . ? 
N2 C9 1.476(5) . ? 
N4 C9 1.254(5) . ? 
N4 C23 1.474(6) . ? 
N38 C19 1.340(6) . ? 
N38 C7 1.349(6) . ? 
C1 C16 1.361(8) . ? 
C1 C2 1.375(8) . ? 
C1 H1A 0.9500 . ? 
C2 C3 1.377(7) . ? 
C2 H2A 0.9500 . ? 
C3 C4 1.385(6) . ? 
C3 H3A 0.9500 . ? 
C4 C17 1.400(6) . ? 
C4 C5 1.475(6) . ? 
C5 C18 1.380(6) . ? 
C5 C6 1.419(6) . ? 
C6 C7 1.350(6) . ? 
C6 H6A 0.9500 . ? 
C7 H7A 0.9500 . ? 
C10 C99A 1.361(6) . ? 
C10 C11 1.400(6) . ? 
C10 H10A 0.9500 . ? 
C11 C26 1.397(5) . ? 
C11 C12 1.475(6) . ? 
C12 C13 1.389(6) . ? 
C12 C29 1.392(6) . ? 
C13 C14 1.380(7) . ? 
C13 H13A 0.9500 . ? 
C14 C15 1.358(7) . ? 
C14 H14A 0.9500 . ? 
C15 C28 1.381(8) . ? 
C15 H15A 0.9500 . ? 
C16 C17 1.379(7) . ? 
C16 H16A 0.9500 . ? 
C17 H17A 0.9500 . ? 
C18 C19 1.395(7) . ? 
C18 H18A 0.9500 . ? 
C19 H19A 0.9500 . ? 
C20 C22 1.496(6) . ? 
C20 C21 1.504(6) . ? 
C20 H20A 1.0000 . ? 
C21 H21A 0.9800 . ? 
C21 H21B 0.9800 . ? 
C21 H21C 0.9800 . ? 
C22 H22A 0.9800 . ? 
C22 H22B 0.9800 . ? 
C22 H22C 0.9800 . ? 
C23 C24 1.496(8) . ? 
C23 C25 1.522(8) . ? 
C23 H23A 1.0000 . ? 
C24 H24A 0.9800 . ? 
C24 H24B 0.9800 . ? 
C24 H24C 0.9800 . ? 
C25 H25A 0.9800 . ? 
C25 H25B 0.9800 . ? 
C25 H25C 0.9800 . ? 
C26 C27 1.365(6) . ? 
C26 H26A 0.9500 . ? 
C27 H27A 0.9500 . ? 
C28 C29 1.382(7) . ? 
C28 H28A 0.9500 . ? 
C29 H29A 0.9500 . ? 
C99A H99A 0.9500 . ? 
S5 O3 1.406(4) . ? 
S5 O5 1.432(4) . ? 
S5 O4 1.433(4) . ? 
S5 C60 1.738(7) . ? 
F13 C60 1.355(6) . ? 
F14 C60 1.379(6) . ? 
F15 C60 1.362(7) . ? 
C58 F6 1.266(7) . ? 
C58 F2A 1.283(11) . ? 
C58 F3A 1.313(11) . ? 
C58 F2 1.325(9) . ? 
C58 F3 1.338(8) . ? 
C58 F6A 1.390(14) . ? 
C58 S3 1.791(5) . ? 
C58 S3A 1.811(8) . ? 
S3 O26 1.387(7) . ? 
S3 O25 1.424(7) . ? 
S3 O27 1.436(9) . ? 
S3A O27A 1.4298 . ? 
S3A O25A 1.4323 . ? 
S3A O26A 1.4327 . ? 
 
loop_ 
 _geom_angle_atom_site_label_1 
 _geom_angle_atom_site_label_2 
 _geom_angle_atom_site_label_3 
 _geom_angle 
 _geom_angle_site_symmetry_1 
 _geom_angle_site_symmetry_3 
 _geom_angle_publ_flag 
N1 S1 N38 105.37(17) . . ? 
C9 N1 C20 122.8(3) . . ? 
C9 N1 S1 115.8(3) . . ? 
C20 N1 S1 121.4(3) . . ? 
C99A N2 C27 121.0(3) . . ? 
C99A N2 C9 119.1(3) . . ? 
C27 N2 C9 119.9(3) . . ? 
C9 N4 C23 123.8(4) . . ? 
C19 N38 C7 122.3(4) . . ? 
C19 N38 S1 117.3(3) . . ? 
C7 N38 S1 120.0(3) . . ? 
C16 C1 C2 119.9(5) . . ? 
C16 C1 H1A 120.1 . . ? 
C2 C1 H1A 120.1 . . ? 
C1 C2 C3 120.6(5) . . ? 
C1 C2 H2A 119.7 . . ? 
C3 C2 H2A 119.7 . . ? 
C2 C3 C4 120.3(5) . . ? 
C2 C3 H3A 119.9 . . ? 
C4 C3 H3A 119.9 . . ? 
C3 C4 C17 118.4(4) . . ? 
C3 C4 C5 120.7(4) . . ? 
C17 C4 C5 120.9(4) . . ? 
C18 C5 C6 116.7(4) . . ? 
C18 C5 C4 122.0(4) . . ? 
C6 C5 C4 121.3(4) . . ? 
C7 C6 C5 121.5(4) . . ? 
C7 C6 H6A 119.3 . . ? 
C5 C6 H6A 119.3 . . ? 
N38 C7 C6 119.6(4) . . ? 
N38 C7 H7A 120.2 . . ? 
C6 C7 H7A 120.2 . . ? 
N4 C9 N1 123.6(4) . . ? 
N4 C9 N2 122.7(4) . . ? 
N1 C9 N2 113.5(3) . . ? 
C99A C10 C11 120.7(4) . . ? 
C99A C10 H10A 119.7 . . ? 
C11 C10 H10A 119.7 . . ? 
C26 C11 C10 117.4(4) . . ? 
C26 C11 C12 121.5(4) . . ? 
C10 C11 C12 121.1(3) . . ? 
C13 C12 C29 117.9(4) . . ? 
C13 C12 C11 121.0(4) . . ? 
C29 C12 C11 121.0(4) . . ? 
C14 C13 C12 120.9(4) . . ? 
C14 C13 H13A 119.5 . . ? 
C12 C13 H13A 119.5 . . ? 
C15 C14 C13 120.8(5) . . ? 
C15 C14 H14A 119.6 . . ? 
C13 C14 H14A 119.6 . . ? 
C14 C15 C28 119.3(5) . . ? 
C14 C15 H15A 120.3 . . ? 
C28 C15 H15A 120.3 . . ? 
C1 C16 C17 120.5(5) . . ? 
C1 C16 H16A 119.8 . . ? 
C17 C16 H16A 119.8 . . ? 
C16 C17 C4 120.4(5) . . ? 
C16 C17 H17A 119.8 . . ? 
C4 C17 H17A 119.8 . . ? 
C5 C18 C19 120.7(4) . . ? 
C5 C18 H18A 119.7 . . ? 
C19 C18 H18A 119.7 . . ? 
N38 C19 C18 119.3(4) . . ? 
N38 C19 H19A 120.3 . . ? 
C18 C19 H19A 120.3 . . ? 
C22 C20 C21 113.0(4) . . ? 
C22 C20 N1 110.8(3) . . ? 
C21 C20 N1 110.7(4) . . ? 
C22 C20 H20A 107.4 . . ? 
C21 C20 H20A 107.4 . . ? 
N1 C20 H20A 107.4 . . ? 
C20 C21 H21A 109.5 . . ? 
C20 C21 H21B 109.5 . . ? 
H21A C21 H21B 109.5 . . ? 
C20 C21 H21C 109.5 . . ? 
H21A C21 H21C 109.5 . . ? 
H21B C21 H21C 109.5 . . ? 
C20 C22 H22A 109.5 . . ? 
C20 C22 H22B 109.5 . . ? 
H22A C22 H22B 109.5 . . ? 
C20 C22 H22C 109.5 . . ? 
H22A C22 H22C 109.5 . . ? 
H22B C22 H22C 109.5 . . ? 
N4 C23 C24 107.6(4) . . ? 
N4 C23 C25 108.1(4) . . ? 
C24 C23 C25 112.2(4) . . ? 
N4 C23 H23A 109.6 . . ? 
C24 C23 H23A 109.6 . . ? 
C25 C23 H23A 109.6 . . ? 
C23 C24 H24A 109.5 . . ? 
C23 C24 H24B 109.5 . . ? 
H24A C24 H24B 109.5 . . ? 
C23 C24 H24C 109.5 . . ? 
H24A C24 H24C 109.5 . . ? 
H24B C24 H24C 109.5 . . ? 
C23 C25 H25A 109.5 . . ? 
C23 C25 H25B 109.5 . . ? 
H25A C25 H25B 109.5 . . ? 
C23 C25 H25C 109.5 . . ? 
H25A C25 H25C 109.5 . . ? 
H25B C25 H25C 109.5 . . ? 
C27 C26 C11 120.3(4) . . ? 
C27 C26 H26A 119.8 . . ? 
C11 C26 H26A 119.8 . . ? 
N2 C27 C26 120.2(3) . . ? 
N2 C27 H27A 119.9 . . ? 
C26 C27 H27A 119.9 . . ? 
C15 C28 C29 120.6(5) . . ? 
C15 C28 H28A 119.7 . . ? 
C29 C28 H28A 119.7 . . ? 
C28 C29 C12 120.4(5) . . ? 
C28 C29 H29A 119.8 . . ? 
C12 C29 H29A 119.8 . . ? 
N2 C99A C10 120.2(4) . . ? 
N2 C99A H99A 119.9 . . ? 
C10 C99A H99A 119.9 . . ? 
O3 S5 O5 116.5(3) . . ? 
O3 S5 O4 112.7(3) . . ? 
O5 S5 O4 115.9(2) . . ? 
O3 S5 C60 102.2(3) . . ? 
O5 S5 C60 104.5(3) . . ? 
O4 S5 C60 102.5(2) . . ? 
F13 C60 F15 103.3(5) . . ? 
F13 C60 F14 104.0(4) . . ? 
F15 C60 F14 105.7(5) . . ? 
F13 C60 S5 114.7(4) . . ? 
F15 C60 S5 114.7(4) . . ? 
F14 C60 S5 113.3(4) . . ? 
F6 C58 F2A 114.8(9) . . ? 
F6 C58 F3A 70.7(10) . . ? 
F2A C58 F3A 111.4(9) . . ? 
F6 C58 F2 107.8(7) . . ? 
F2A C58 F2 15.8(14) . . ? 
F3A C58 F2 123.9(9) . . ? 
F6 C58 F3 107.5(8) . . ? 
F2A C58 F3 90.2(10) . . ? 
F3A C58 F3 37.3(9) . . ? 
F2 C58 F3 106.0(8) . . ? 
F6 C58 F6A 32.4(9) . . ? 
F2A C58 F6A 104.9(7) . . ? 
F3A C58 F6A 103.0(7) . . ? 
F2 C58 F6A 91.7(12) . . ? 
F3 C58 F6A 139.8(9) . . ? 
F6 C58 S3 114.5(5) . . ? 
F2A C58 S3 118.3(7) . . ? 
F3A C58 S3 118.3(6) . . ? 
F2 C58 S3 112.7(5) . . ? 
F3 C58 S3 107.9(4) . . ? 
F6A C58 S3 97.4(8) . . ? 
F6 C58 S3A 123.8(6) . . ? 
F2A C58 S3A 114.6(6) . . ? 
F3A C58 S3A 112.8(6) . . ? 
F2 C58 S3A 112.5(6) . . ? 
F3 C58 S3A 97.3(6) . . ? 
F6A C58 S3A 109.0(7) . . ? 
S3 C58 S3A 11.7(4) . . ? 
O26 S3 O25 116.0(5) . . ? 
O26 S3 O27 115.5(6) . . ? 
O25 S3 O27 114.4(6) . . ? 
O26 S3 C58 104.3(3) . . ? 
O25 S3 C58 104.2(4) . . ? 
O27 S3 C58 99.6(5) . . ? 
O27A S3A O25A 115.4 . . ? 
O27A S3A O26A 114.6 . . ? 
O25A S3A O26A 115.1 . . ? 
O27A S3A C58 100.9(5) . . ? 
O25A S3A C58 103.4(4) . . ? 
O26A S3A C58 104.9(4) . . ? 
 
loop_ 
 _geom_torsion_atom_site_label_1 
 _geom_torsion_atom_site_label_2 
 _geom_torsion_atom_site_label_3 
 _geom_torsion_atom_site_label_4 
 _geom_torsion 
 _geom_torsion_site_symmetry_1 
 _geom_torsion_site_symmetry_2 
 _geom_torsion_site_symmetry_3 
 _geom_torsion_site_symmetry_4 
 _geom_torsion_publ_flag 
N38 S1 N1 C9 82.9(3) . . . . ? 
N38 S1 N1 C20 -96.2(3) . . . . ? 
N1 S1 N38 C19 -91.6(3) . . . . ? 
N1 S1 N38 C7 95.6(4) . . . . ? 
C16 C1 C2 C3 0.6(8) . . . . ? 
C1 C2 C3 C4 -0.2(8) . . . . ? 
C2 C3 C4 C17 -0.5(7) . . . . ? 
C2 C3 C4 C5 -178.7(4) . . . . ? 
C3 C4 C5 C18 151.7(5) . . . . ? 
C17 C4 C5 C18 -26.5(6) . . . . ? 
C3 C4 C5 C6 -27.8(6) . . . . ? 
C17 C4 C5 C6 154.0(4) . . . . ? 
C18 C5 C6 C7 1.2(7) . . . . ? 
C4 C5 C6 C7 -179.2(4) . . . . ? 
C19 N38 C7 C6 2.0(7) . . . . ? 
S1 N38 C7 C6 174.4(4) . . . . ? 
C5 C6 C7 N38 -1.6(7) . . . . ? 
C23 N4 C9 N1 171.1(4) . . . . ? 
C23 N4 C9 N2 -3.5(7) . . . . ? 
C20 N1 C9 N4 159.0(4) . . . . ? 
S1 N1 C9 N4 -20.1(6) . . . . ? 
C20 N1 C9 N2 -26.0(5) . . . . ? 
S1 N1 C9 N2 154.9(3) . . . . ? 
C99A N2 C9 N4 102.0(5) . . . . ? 
C27 N2 C9 N4 -75.9(5) . . . . ? 
C99A N2 C9 N1 -73.0(4) . . . . ? 
C27 N2 C9 N1 109.0(4) . . . . ? 
C99A C10 C11 C26 2.3(6) . . . . ? 
C99A C10 C11 C12 -176.4(4) . . . . ? 
C26 C11 C12 C13 -151.4(4) . . . . ? 
C10 C11 C12 C13 27.2(6) . . . . ? 
C26 C11 C12 C29 26.7(6) . . . . ? 
C10 C11 C12 C29 -154.7(4) . . . . ? 
C29 C12 C13 C14 -0.1(7) . . . . ? 
C11 C12 C13 C14 178.1(4) . . . . ? 
C12 C13 C14 C15 0.4(7) . . . . ? 
C13 C14 C15 C28 -0.3(8) . . . . ? 
C2 C1 C16 C17 -0.4(8) . . . . ? 
C1 C16 C17 C4 -0.3(7) . . . . ? 
C3 C4 C17 C16 0.7(7) . . . . ? 
C5 C4 C17 C16 178.9(4) . . . . ? 
C6 C5 C18 C19 -1.1(7) . . . . ? 
C4 C5 C18 C19 179.3(4) . . . . ? 
C7 N38 C19 C18 -1.9(7) . . . . ? 
S1 N38 C19 C18 -174.6(3) . . . . ? 
C5 C18 C19 N38 1.5(7) . . . . ? 
C9 N1 C20 C22 -95.3(5) . . . . ? 
S1 N1 C20 C22 83.8(4) . . . . ? 
C9 N1 C20 C21 138.6(4) . . . . ? 
S1 N1 C20 C21 -42.3(5) . . . . ? 
C9 N4 C23 C24 132.5(5) . . . . ? 
C9 N4 C23 C25 -106.1(5) . . . . ? 
C10 C11 C26 C27 -1.8(5) . . . . ? 
C12 C11 C26 C27 176.8(4) . . . . ? 
C99A N2 C27 C26 2.5(5) . . . . ? 
C9 N2 C27 C26 -179.6(3) . . . . ? 
C11 C26 C27 N2 -0.5(6) . . . . ? 
C14 C15 C28 C29 -0.1(9) . . . . ? 
C15 C28 C29 C12 0.5(9) . . . . ? 
C13 C12 C29 C28 -0.3(8) . . . . ? 
C11 C12 C29 C28 -178.5(5) . . . . ? 
C27 N2 C99A C10 -2.0(6) . . . . ? 
C9 N2 C99A C10 -179.9(3) . . . . ? 
C11 C10 C99A N2 -0.4(6) . . . . ? 
O3 S5 C60 F13 178.3(4) . . . . ? 
O5 S5 C60 F13 -59.8(4) . . . . ? 
O4 S5 C60 F13 61.4(4) . . . . ? 
O3 S5 C60 F15 59.0(5) . . . . ? 
O5 S5 C60 F15 -179.2(4) . . . . ? 
O4 S5 C60 F15 -57.9(5) . . . . ? 
O3 S5 C60 F14 -62.5(5) . . . . ? 
O5 S5 C60 F14 59.3(4) . . . . ? 
O4 S5 C60 F14 -179.4(4) . . . . ? 
F6 C58 S3 O26 177.4(8) . . . . ? 
F2A C58 S3 O26 -42.4(12) . . . . ? 
F3A C58 S3 O26 97.0(12) . . . . ? 
F2 C58 S3 O26 -58.8(9) . . . . ? 
F3 C58 S3 O26 57.9(6) . . . . ? 
F6A C58 S3 O26 -153.8(9) . . . . ? 
S3A C58 S3 O26 32.3(16) . . . . ? 
F6 C58 S3 O25 55.4(9) . . . . ? 
F2A C58 S3 O25 -164.5(13) . . . . ? 
F3A C58 S3 O25 -25.0(14) . . . . ? 
F2 C58 S3 O25 179.1(8) . . . . ? 
F3 C58 S3 O25 -64.2(7) . . . . ? 
F6A C58 S3 O25 84.1(11) . . . . ? 
S3A C58 S3 O25 -89.7(16) . . . . ? 
F6 C58 S3 O27 -63.0(9) . . . . ? 
F2A C58 S3 O27 77.1(11) . . . . ? 
F3A C58 S3 O27 -143.4(12) . . . . ? 
F2 C58 S3 O27 60.7(9) . . . . ? 
F3 C58 S3 O27 177.4(6) . . . . ? 
F6A C58 S3 O27 -34.3(9) . . . . ? 
S3A C58 S3 O27 151.9(17) . . . . ? 
F6 C58 S3A O27A 146.0(10) . . . . ? 
F2A C58 S3A O27A -64.3(9) . . . . ? 
F3A C58 S3A O27A 64.6(9) . . . . ? 
F2 C58 S3A O27A -81.4(11) . . . . ? 
F3 C58 S3A O27A 29.3(7) . . . . ? 
F6A C58 S3A O27A 178.4(5) . . . . ? 
S3 C58 S3A O27A -175.1(18) . . . . ? 
F6 C58 S3A O25A -94.3(10) . . . . ? 
F2A C58 S3A O25A 55.4(10) . . . . ? 
F3A C58 S3A O25A -175.7(7) . . . . ? 
F2 C58 S3A O25A 38.3(11) . . . . ? 
F3 C58 S3A O25A 149.0(7) . . . . ? 
F6A C58 S3A O25A -61.9(6) . . . . ? 
S3 C58 S3A O25A -55.4(18) . . . . ? 
F6 C58 S3A O26A 26.7(10) . . . . ? 
F2A C58 S3A O26A 176.3(8) . . . . ? 
F3A C58 S3A O26A -54.8(9) . . . . ? 
F2 C58 S3A O26A 159.2(11) . . . . ? 
F3 C58 S3A O26A -90.1(7) . . . . ? 
F6A C58 S3A O26A 59.0(6) . . . . ? 
S3 C58 S3A O26A 65.5(18) . . . . ? 
 
_diffrn_measured_fraction_theta_max     .938 
_diffrn_reflns_theta_full              24.72 
_diffrn_measured_fraction_theta_full    .938 
_refine_diff_density_max    1.976 
_refine_diff_density_min    -.571 
_refine_diff_density_rms     .079 
